# Supplementary material for: Differential Sensitivity of Target Genes to Translational Repression by miR-17~92
Source: PubMed Central journal article supplement (PMC5348049; doi:10.1371/journal.pgen.1006623), 2017-02-27

-  miR-17 subfamily
-  miR-18 subfamily
-  miR-19 subfamily
-  miR-92 subfamily

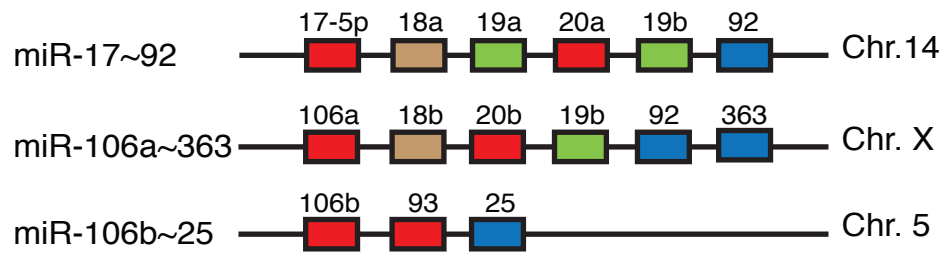

Supplement: pgen.1006623.s001.pdf [file pgen.1006623.s001.pdf]
