# Supplementary material for: Differential Sensitivity of Target Genes to Translational Repression by miR-17~92
Source: PubMed Central journal article supplement (PMC5348049; doi:10.1371/journal.pgen.1006623), 2017-02-27
Supplement: pgen.1006623.s002.pdf [file pgen.1006623.s002.pdf]

**A****ERCC-RNA-seq**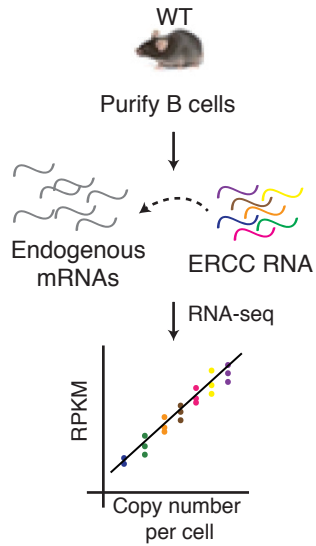

**Measure absolute mRNA  
copy number per cell**

**B****Microarray**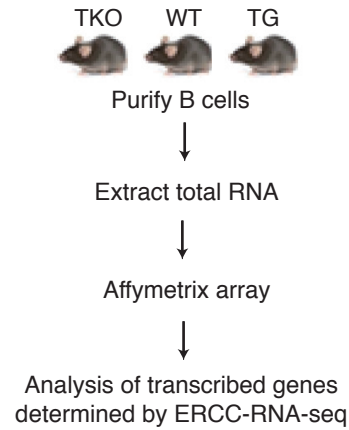

**Measure relative target  
mRNA abundance**

**C****Ribosome profiling**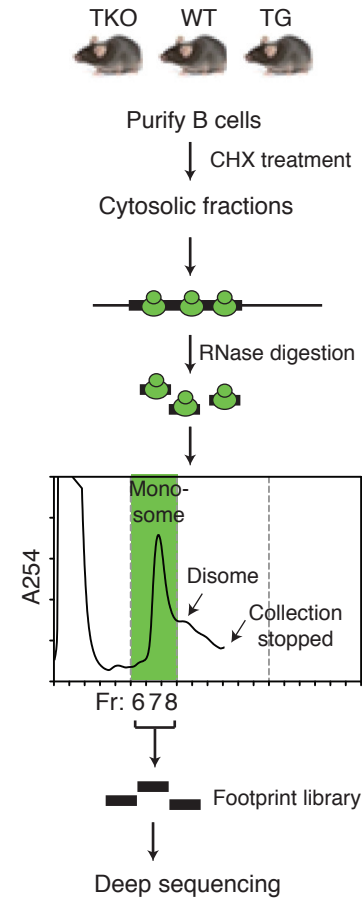

**Measure relative  
ribosome footprint  
abundance**

**D****Polysome profiling**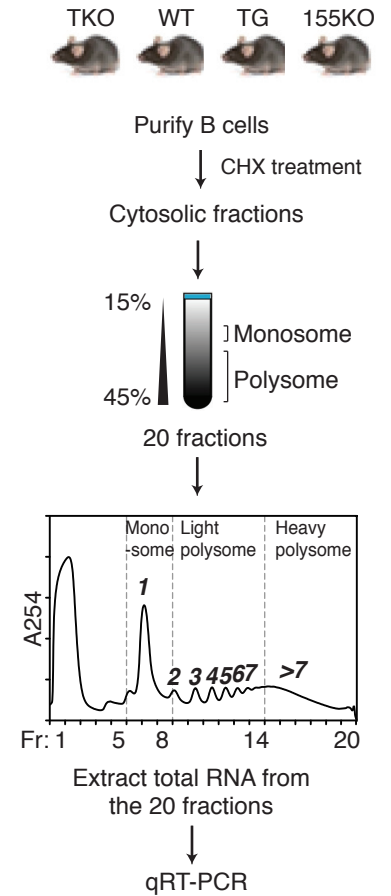

**Measure ribosome  
number  
per mRNA**
