# Supplementary material for: Differential Sensitivity of Target Genes to Translational Repression by miR-17~92
Source: PubMed Central journal article supplement (PMC5348049; doi:10.1371/journal.pgen.1006623), 2017-02-27

**A**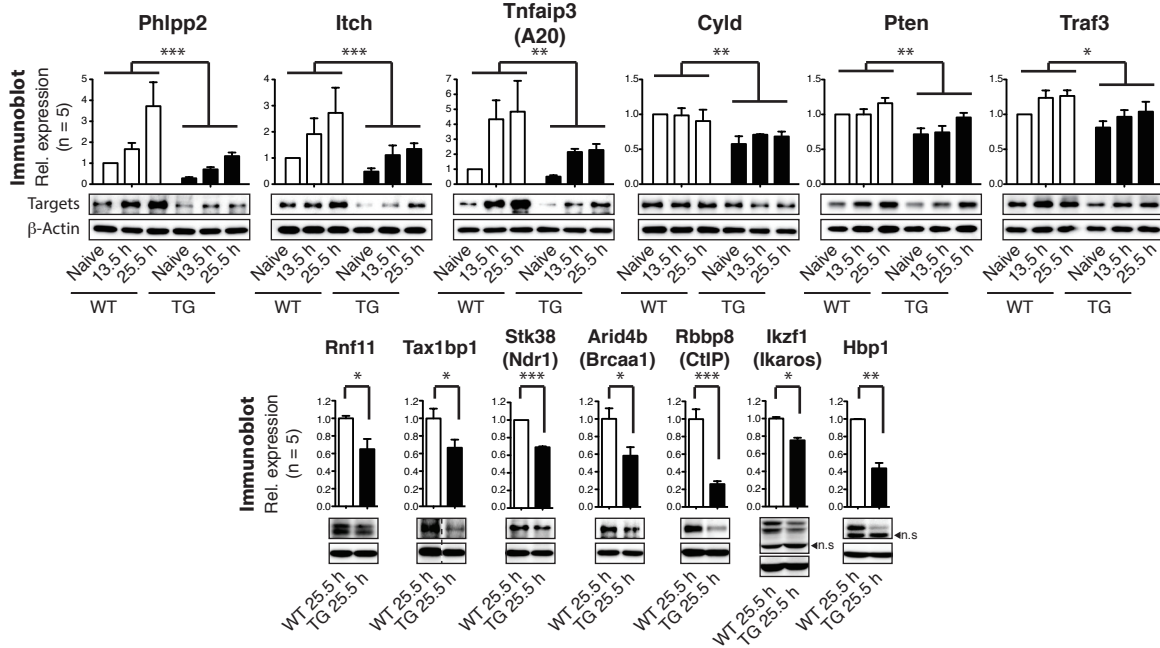**B**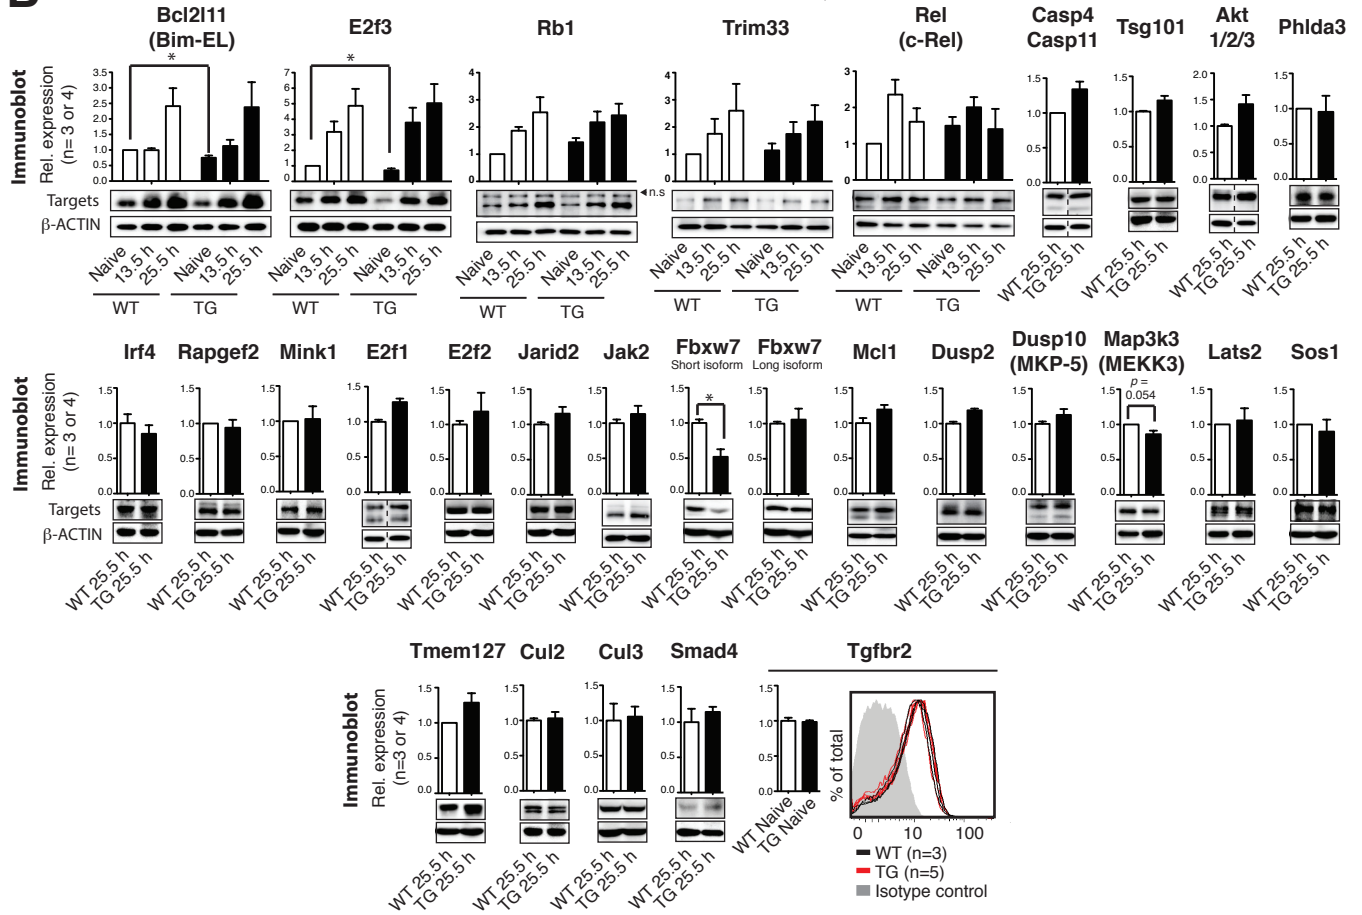**C**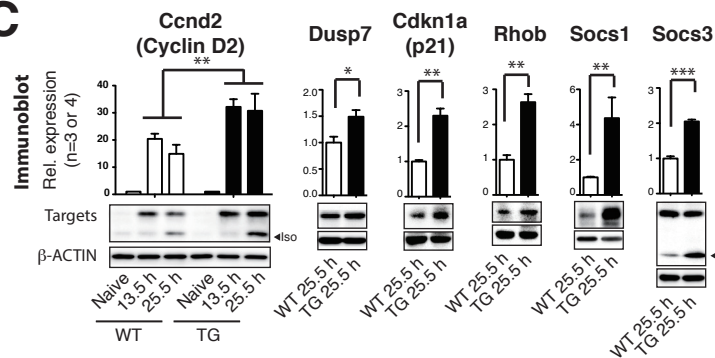

Supplement: pgen.1006623.s007.pdf [file pgen.1006623.s007.pdf]
