# Supplementary material for: Differential Sensitivity of Target Genes to Translational Repression by miR-17~92
Source: PubMed Central journal article supplement (PMC5348049; doi:10.1371/journal.pgen.1006623), 2017-02-27

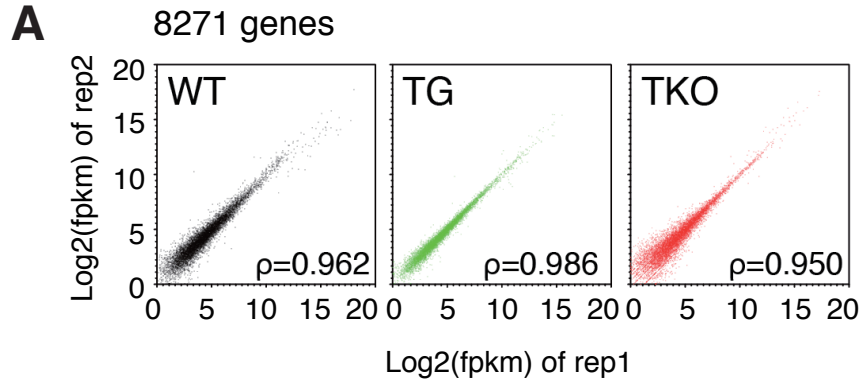

- B**
- Targets suppressed in TG B cells
  - Other targets
  - Positive and negative controls

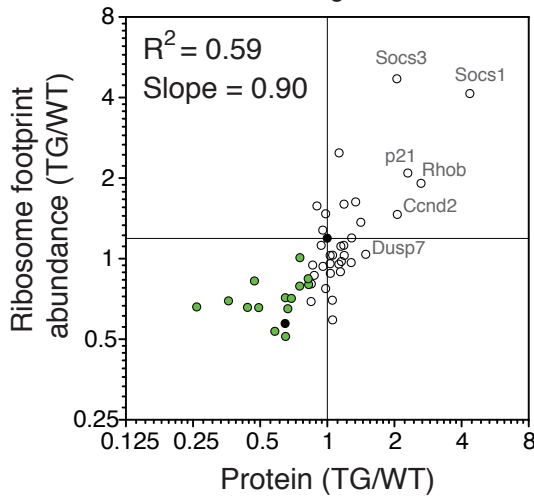

- C**
- Targets suppressed in TG B cells
  - Other targets
  - Positive and negative controls

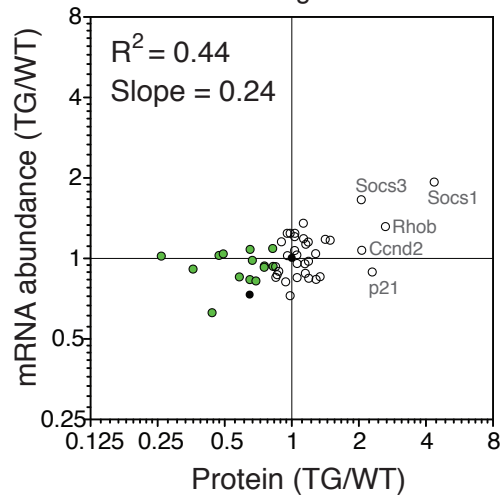

- D**
- Targets suppressed in TG B cells
  - Positive and negative controls

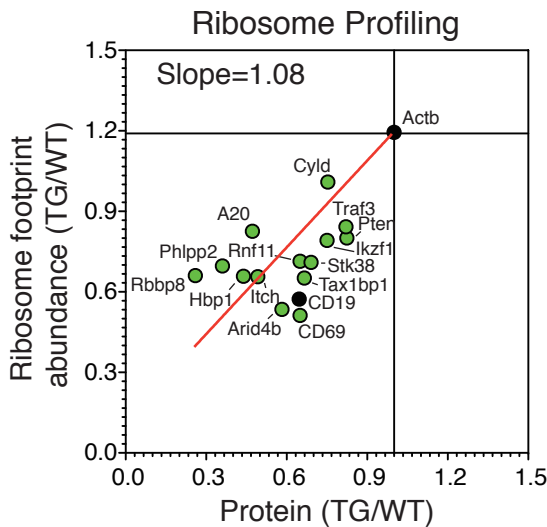

- E**
- Targets suppressed in TG B cells
  - Positive and negative controls

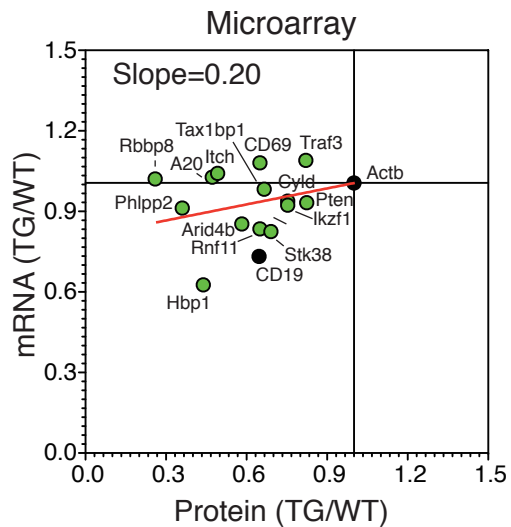

Supplement: pgen.1006623.s009.pdf [file pgen.1006623.s009.pdf]
