# Supplementary material for: Differential Sensitivity of Target Genes to Translational Repression by miR-17~92
Source: PubMed Central journal article supplement (PMC5348049; doi:10.1371/journal.pgen.1006623), 2017-02-27

**A**

Transcribed targets (780)

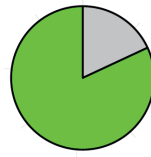

Un-translated (139)

Translated targets (641)

**B**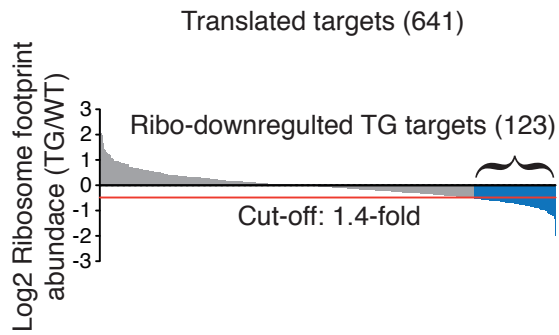**C**

○ Ribo-downregulated TG targets (123)  
○ Other translated targets (518)

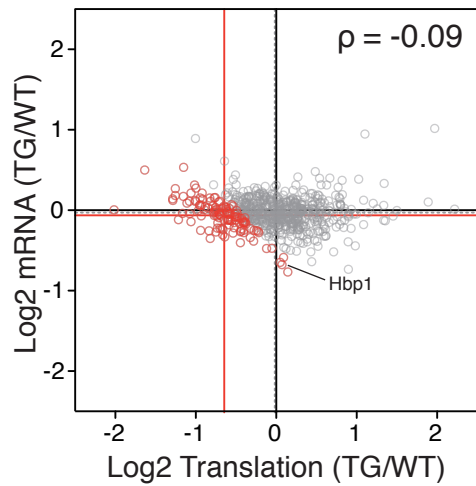**D**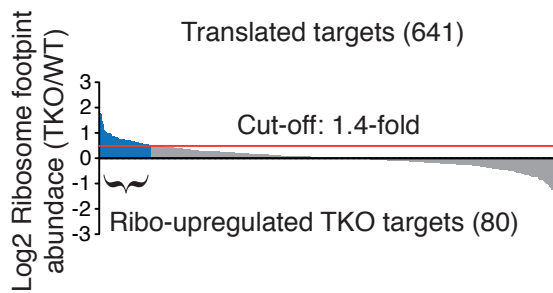**E**

○ Ribo-upregulated TKO targets (80)  
○ Other translated targets (561)

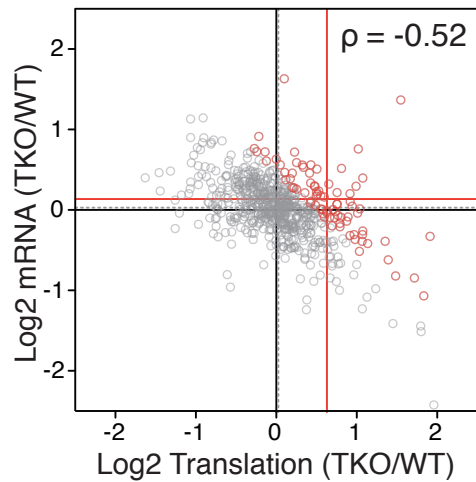

Supplement: pgen.1006623.s010.pdf [file pgen.1006623.s010.pdf]
