# Supplementary material for: Differential Sensitivity of Target Genes to Translational Repression by miR-17~92
Source: PubMed Central journal article supplement (PMC5348049; doi:10.1371/journal.pgen.1006623), 2017-02-27

**A**

Targets suppressed in TG B cells

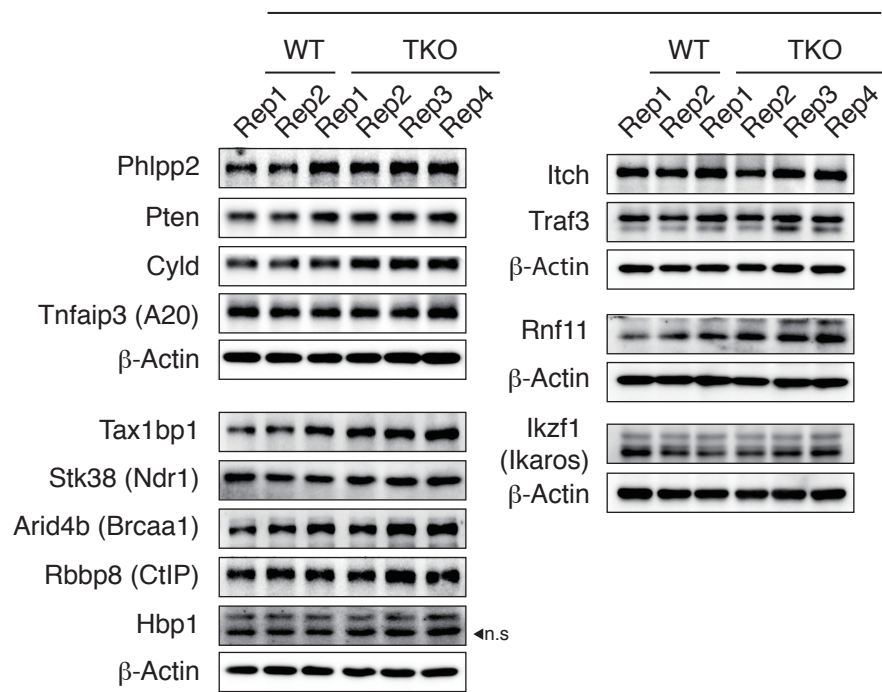**B**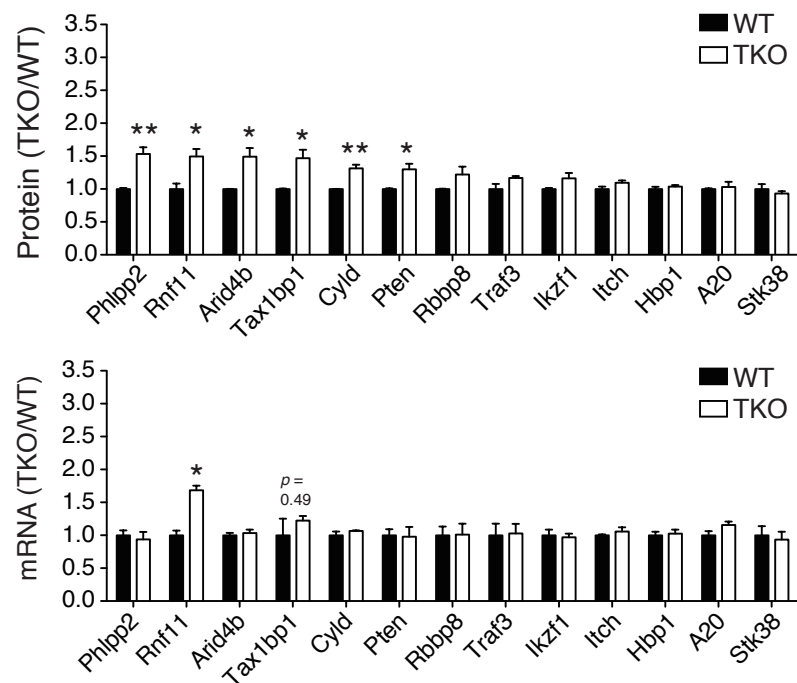**C**

Targets upregulated in TKO B cells

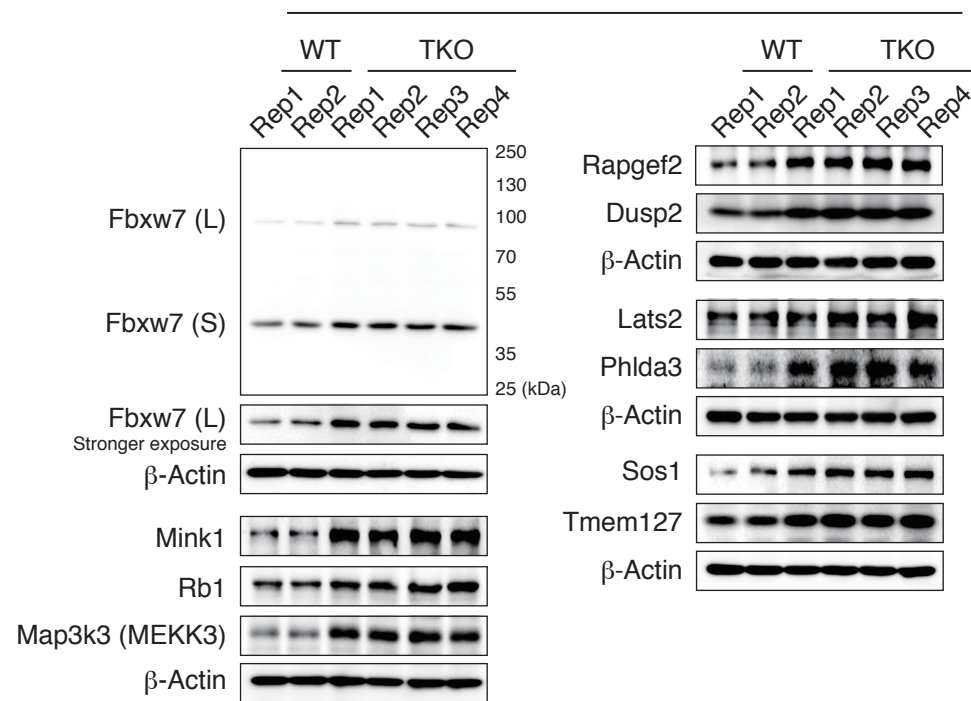**D**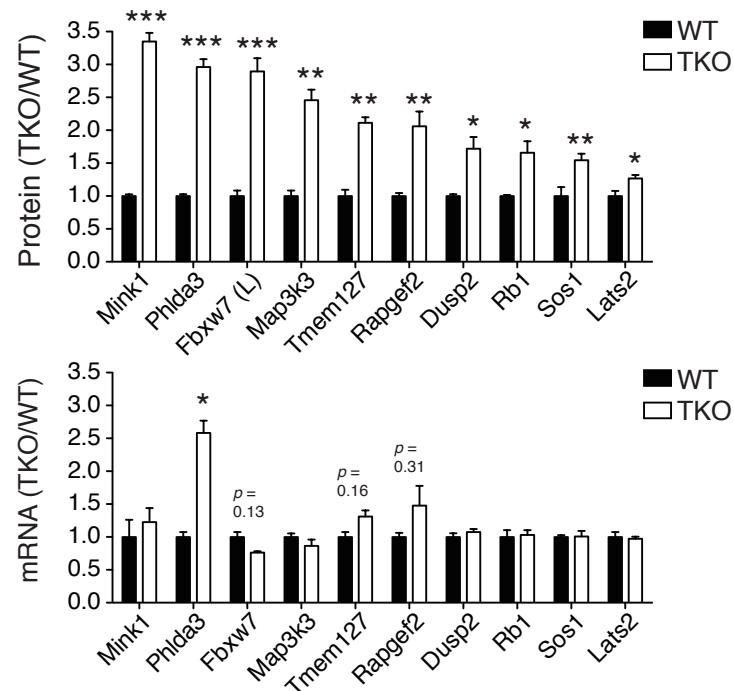

Supplement: pgen.1006623.s011.pdf [file pgen.1006623.s011.pdf]
