# Supplementary material for: Differential Sensitivity of Target Genes to Translational Repression by miR-17~92
Source: PubMed Central journal article supplement (PMC5348049; doi:10.1371/journal.pgen.1006623), 2017-02-27
Supplement: pgen.1006623.s013.pdf [file pgen.1006623.s013.pdf]

Overall effect of miRNA on targets

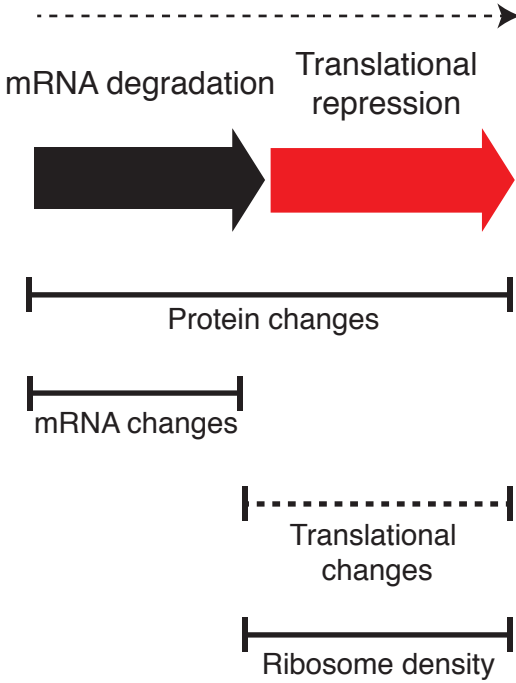

| Method                                         | Direct vs. Indirect |
|------------------------------------------------|---------------------|
| Immunoblot<br>Proteomics<br>Ribosome Profiling | Direct              |
| qRT-PCR<br>Microarray<br>RNA-seq               | Direct              |
| Subtract mRNA changes from protein changes     | Indirect estimation |
| <b>Polysome Profiling</b>                      | <b>Direct</b>       |
