# Supplementary material for: Differential Sensitivity of Target Genes to Translational Repression by miR-17~92
Source: PubMed Central journal article supplement (PMC5348049; doi:10.1371/journal.pgen.1006623), 2017-02-27
Supplement: pgen.1006623.s017.pdf [file pgen.1006623.s017.pdf]

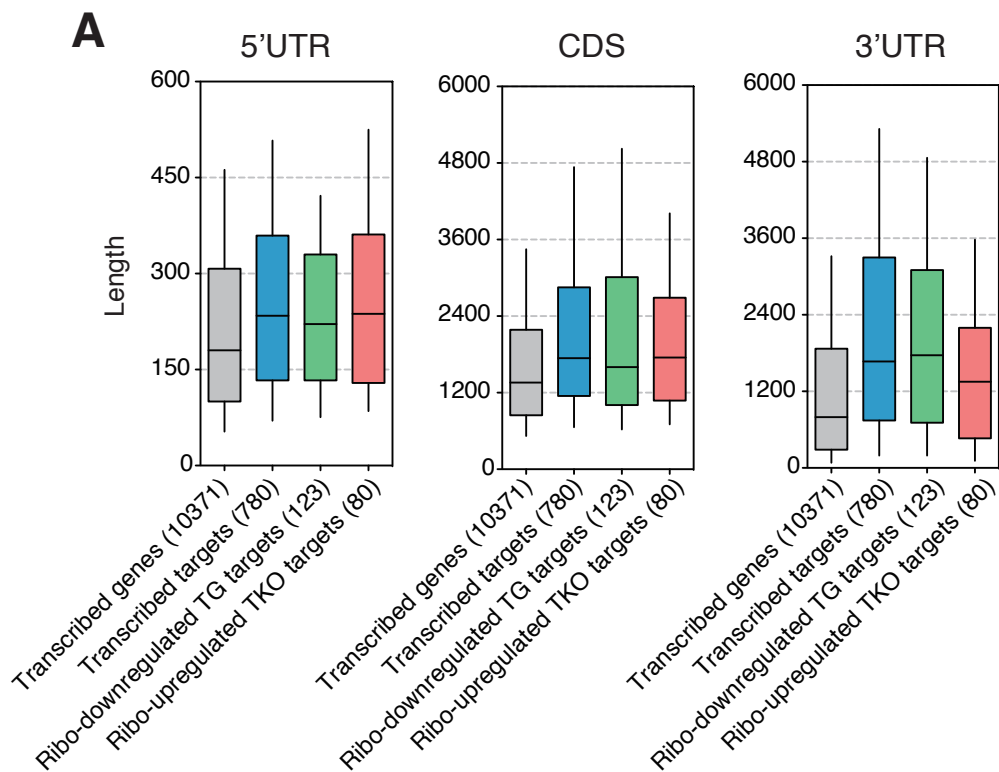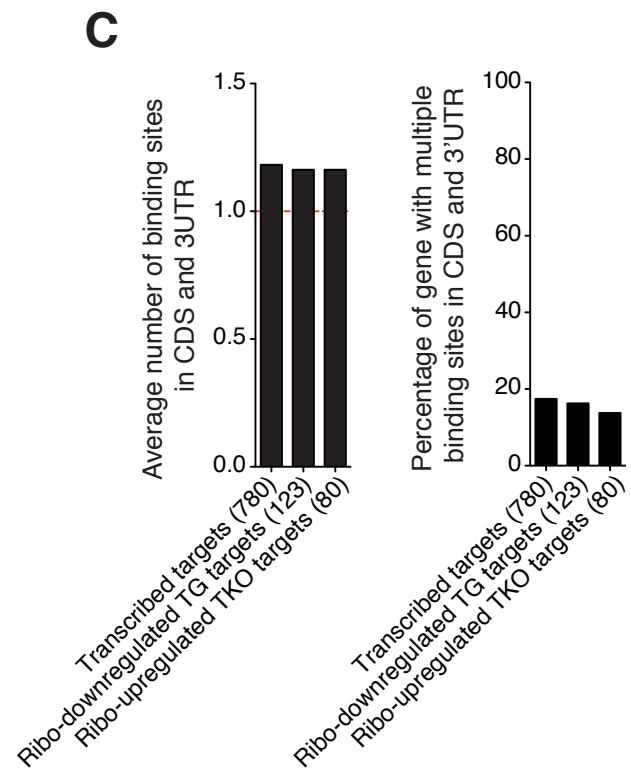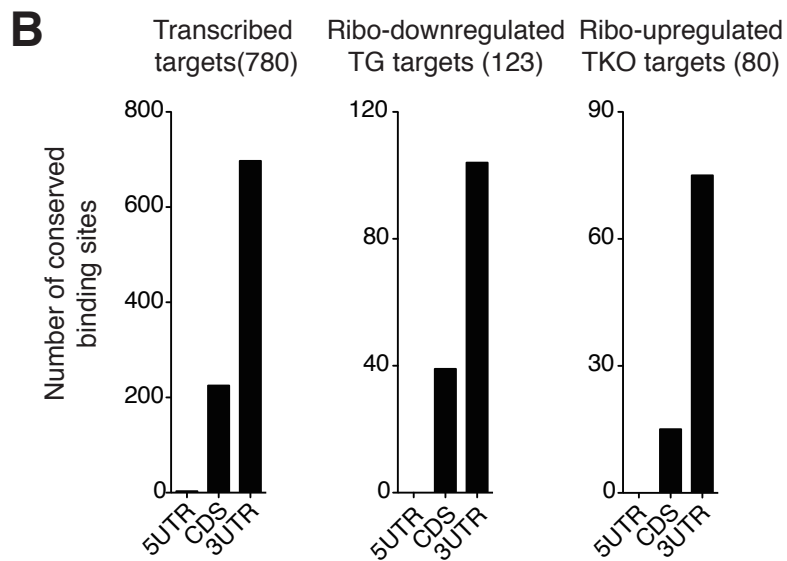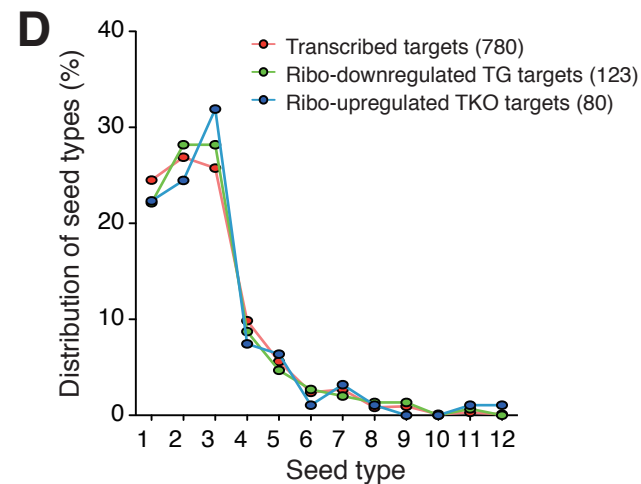

- |              |                |
|--------------|----------------|
| 1. 7mer1A    | 7. 10mer1A     |
| 2. 7mer 2-8  | 8. 10mer 2-11  |
| 3. 8mer1A    | 9. 11mer1A     |
| 4. 8mer 2-9  | 10. 11mer 2-12 |
| 5. 9mer 1A   | 11. 12mer 1A   |
| 6. 9mer 2-10 | 12. 12mer 2-13 |
