# Supplementary material for: Differential Sensitivity of Target Genes to Translational Repression by miR-17~92
Source: PubMed Central journal article supplement (PMC5348049; doi:10.1371/journal.pgen.1006623), 2017-02-27
Supplement: pgen.1006623.s031.pdf [file pgen.1006623.s031.pdf]

# Differential sensitivity of target genes to translational repression by miR-17~92

Jin et al., PLOS Genetics (2017)  
DOI: 10.1371/journal.pgen.1006623

## Supplemental Experimental Procedures:

### Northern blot and Probes

MiRNA Northern blotting was done as previously described [1, 2]. Briefly, 10~20µg total RNA extracted using TRIzol Reagent (Invitrogen, 15596-026) was separated on 10% denaturing polyacrylamide gels and electrotransferred to nylon membrane. DNA oligonucleotides antisense to mature miRNAs end-labeled with <sup>32</sup>P were used as probes. U6 snRNA was used as internal control. To determine the absolute copy numbers of miR-17~92 family miRNAs, graded amounts of chemically synthesized mature miRNAs (miR-17, miR-18a, miR-19b miR-92 and miR-155 from Dharmacon) were added into known numbers of TKO B cells before RNA extraction. These samples were compared with WT B cells by Northern blot, using a probe mix containing equal amounts of probes corresponding to each member of a miRNA subfamily. For example, to detect miR-17 subfamily miRNAs, an equal molar mixture of probes corresponding to miR-17-5p, miR-20a, miR-106a, miR-20b, miR-106b, and miR-93 was used. The sequences of probes used in this study are:

| miRNA subfamily          | Mature miRNAs | Northern blot probes (Seed sequences are underlined) |
|--------------------------|---------------|------------------------------------------------------|
| <i>miR-17 subfamily:</i> | mmu-miR-17-5p | ACT ACC TGC ACT GTA <u>AGC ACT TTG</u>               |
|                          | mmu-miR-20a   | CTA CCT GCA CTA TAA <u>GCA CTT TA</u>                |
|                          | mmu-miR-106a  | CTA CCT GCA CTG TTA <u>GCA CTT TG</u>                |
|                          | mmu-miR-20b   | CTA CCT GCA CTA TGA <u>GCA CTT TG</u>                |
|                          | mmu-miR-106b  | ATC TGC ACT GTC <u>AGC ACT TTA</u>                   |

|                          |              |                                |
|--------------------------|--------------|--------------------------------|
|                          | mmu-miR-93   | CTA CCT GCA CGA ACA GCA CTT TG |
| <i>miR-18 subfamily:</i> | mmu-miR-18a  | CTA TCT GCA CTA GAT GCA CCT TA |
|                          | mmu-miR-18b  | CTA ACA GCA CTA GAT GCA CCT TA |
| <i>miR-19 subfamily:</i> | mmu-miR-19a  | TCA GTT TTG CAT AGA TTT GCA CA |
|                          | mmu-miR-19b  | TCA GTT TTG CAT GGA TTT GCA CA |
| <i>miR-92 subfamily:</i> | mmu-miR-92   | CAG GCC GGG ACA AGT GCA ATA    |
|                          | mmu-miR-363  | TAC AGA TGG ATA CCG TGC AAT T  |
|                          | mmu-miR-25   | TCA GAC CGA GAC AAG TGC AAT G  |
| <i>miR-155</i>           | mmu-miR -155 | CCC CTA TCA CAA TTA GCA TTA A  |
| U6 snRNA (control)       |              | TAT GTG CTG CCG AAG CGA GCA C  |

### Immunoblot and Antibodies

B cells were lysed in buffer containing 1% Nonidet P-40, 150 mM NaCl, 50 mM Tris-Cl (pH 8.0), 1 mM sodium orthovanadate, 1 mM DTT and proteinase/phosphatase inhibitors (Thermo, #78442). 10 µg protein lysates were subjected to 8% - 16 % SDS-PAGE and Immunoblot, depending on molecular weight of genes of interest. Primary antibodies were incubated overnight at 4°C. Antibodies used for Immunoblot in this study are:

| Providers             | Gene name and catalog number                                                                                                                                                                                                                                                                                                                                              |
|-----------------------|---------------------------------------------------------------------------------------------------------------------------------------------------------------------------------------------------------------------------------------------------------------------------------------------------------------------------------------------------------------------------|
| <i>Cell Signaling</i> | anti-4EBP1 (cst-9644), anti-4EBP2 (cst-2845), anti-Bim (cst-2933), anti-Cul3 (cst-2759), anti-eEF2 (cst-2332), anti-eIF2A (cst-9722), anti-eIF4A (cst-2013), anti-eIF4B (cst-3592), anti-eIF4E (cst-2067), anti-eIF4G (cst-2498), anti-eIF5 (cst-2480), anti-Irf4 (cst-4694), anti-Jak2 (cst-3230), anti-mTOR (cst-2983), anti-MAP3K3 (MEKK3) (cst-5727), anti-Mnk1 (cst- |

|                                     |                                                                                                                                                                                                                                                                                                                                       |
|-------------------------------------|---------------------------------------------------------------------------------------------------------------------------------------------------------------------------------------------------------------------------------------------------------------------------------------------------------------------------------------|
|                                     | 2195), anti-Pabp1 (cst-4992), anti-Pdcd4 (cst-9535), anti-Phlda3 (cst-4294), anti-Pten (cst-9559), anti-Smad4 (cst-9515), anti-Socs3 (cst-9172), anti-RhoB (cst-2098), anti-Traf3 (cst-4729), anti-S6 (cst-2317), anti-Trim33 (cst-8972), phospho-Erk (MAPK44/42, cst-9101), and anti-phospho-S6 (cst-4856)                           |
| <i>Santa Cruz<br/>Biotechnology</i> | anti-Cyld (sc-137139), anti-Tnfaip1(A20) (sc-16692), anti-Stk38 (Ndr1) (sc-46184), anti-Dusp10 (sc-135201), anti-Mcl1 (sc-819), anti-Mnk2 (sc-6964), anti-Ccnd2 (sc-593), anti-c-Rel (sc-71), anti-E2f1 (sc-193), anti-E2f2 (sc-633), anti-Ikzf1(Ikaros) (sc-9859), anti-E2f3 (sc-879), anti-Rb1 (sc-50), and anti-Akt1/2/3 (sc-8312) |
| <i>Abcam</i>                        | anti-Rnf11 (ab57180), anti-Tax1bp1 (ab22049), anti-Cul2 (ab2135) and anti-Dusp2 (ab95159)                                                                                                                                                                                                                                             |
| <i>Bethyl Laboratories</i>          | anti-Phlpp2 (A300-661A-1), anti-Lats2 (A200-479A), anti-Mink1 (A302-191A), anti-Rapgef2 (PDZ-GEF1) (A301-966A), anti-Sos1 (A301-890A), anti-Tmem127 (A303-450A) and anti-Arid4b (A302-233A).                                                                                                                                          |
| <i>Sigma-Aldrich</i>                | anti-Tsg101 (T5701) and anti- $\beta$ -Actin (A2228).                                                                                                                                                                                                                                                                                 |
| <i>Novus Biologicals</i>            | anti-Casp11/Casp4 (NB120-10454), anti-eIF3C (NB100-511) and anti-Jarid2 (NB100-2214)                                                                                                                                                                                                                                                  |
| <i>Others</i>                       | anti-Hbp1 (Proteintech, 11746-1-AP), anti-Itch (BD Transduction Laboratories, 611199), anti-Dusp7 (Bioss, 7928R), anti-Rbbp8 (CtIP) (Active Motif 61141), anti-Socs1 (MBL, K0175-3), and anti-Cdkn1a (P21) (BD Pharmingen, 556430).                                                                                                   |

## Flow Cytometry

Cell surface staining and flow cytometric analysis were performed following established protocols. Stained cells were analyzed on FACSCalibur or LSR II (BD Biosciences). Data were analyzed with FlowJo software (Tree Star, Ashland, OR). Antibodies and reagents with the following specificities were used for staining: anti-CD19 (1D3, BD Bioscience), anti-Tgfr2 (FAB532A, R&D Systems) and anti-CD69 (104508, BioLegend)

## Quantitative RT-PCR and Primers

B cells were purified as described. Total RNA was extracted using TRIzol Reagent (Invitrogen, 15596-026). The first cDNA strand was synthesized by reverse transcription using a primer mix of oligo-dT and random hexamers following manufacturer's instructions (Bio-Rad 170-8890) and used for quantitative real time PCR (Thermo Scientific, K0222) following the manufacturer's protocol. Analysis was performed on technical triplicates for each biological sample.  $\beta$ -Actin (*Actb*) was used for normalization. hRluc and Fluc primers are modified from a previous publication [3]. The following primers were used in this study:

| Gene name          | Forward primers                   | Reverse primers                     |
|--------------------|-----------------------------------|-------------------------------------|
| <i>Actb</i>        | 5'-CTA AGG CCA ACC GTG AAA G-3'   | 5'-ACC AGA GGC ATA CAG GGA CA -3'   |
| <i>Pten</i>        | 5'-TGG GGA AGT AAG GAC CAG AG-3'  | 5'-GGC AGA CCA CAA ACT GAG GA-3'    |
| <i>Phlpp2</i>      | 5'-ATC TGG TCA GGA GAC TGG A-3'   | 5'-GGA TTC GAT CCA GAT GAT CCA-3'   |
| <i>Cyld</i>        | 5'-TGG GAT GGA AGG TTT GAT GG-3'  | 5'-CAT AAA GGC AAG TTT GGG AGG-3'   |
| <i>Itch</i>        | 5'-AAC ATT CCC TCC GAA ATT ACC-3' | 5'-CAT CAA TAA GAC AGC AAA CCT G-3' |
| <i>Tnfr3 (A20)</i> | 5'-TTT AAA TTC CGC TGG CAG C-3'   | 5'-ATT CCA GTT CCG AGT GTC G-3'     |
| <i>Traf3</i>       | 5'-AGG AGA AGT TTG TGA AGA CGG-3' | 5'-TGT GCA TTT TGG ACT GGA GG-3'    |
| <i>Sfp1 (PU.1)</i> | 5'-GTC TGA TGG AGA AGC TGA TGG-3' | 5'-AGA TGC TGT CCT TCA TGT CG-3'    |

|                       |                                         |                                         |
|-----------------------|-----------------------------------------|-----------------------------------------|
| <i>Aicda (AID)</i>    | 5'-TCG GGA TCA TGA CCT TCA AAG-3'       | 5'-TCG TAC AAG GGC AAA AGG ATG-3'       |
| <i>CD69</i>           | 5'-GAC ATG GAA ATG GGC AAA TGG-3'       | 5'-CGT CAT CTG GAG GGC TTG-3'           |
| <i>Tax1bp1</i>        | 5'-TGC CAT TAC ACC TTA ACT CCG-3'       | 5'-CAA TTG ACT GTT GAT CCT TCC AC-3'    |
| <i>Stk38 (NDR1)</i>   | 5'-AGG AGC ATT TGG TGA GGT G-3'         | 5'-CTG CCT CCA CTA GAA TGT CAC-3'       |
| <i>Arid4b</i>         | 5'-ACA GCA AGT CTC CAG CAA G-3'         | 5'-CAG CAC TTG TCA TAT TTT CCA GG-3'    |
| <i>Rnf11</i>          | 5'-AAC TGC CTC AAA TCC CCG-3'           | 5'-TGA TAG ATG GGA ACA GGA ACT TG-3'    |
| <i>Rbbp8 (CtIP)</i>   | 5'-CCA AGC AAC CAA GAT ACG TCC-3'       | 5'-TCC ATG TCC ACT GTT TCT CC-3'        |
| <i>Ikzf1 (IKAROS)</i> | 5'- AGT TCT CAT CCC ATA TCA CGC-3'      | 5'- GCA AAT CCA CTC CCA ACA TTG-3'      |
| <i>Hbp1</i>           | 5'- CGT GAA GAT GAG GTG GAC TG-3'       | 5'- GGC GTG CAT AGG AAT GTA AAC-3'      |
| hRluc                 | 5'- TGC AAG CAA ATG AAC GTG CTG GAC -3' | 5'- ATT CCG ATC AGA TCA GGG ATG ATG -3' |
| Fluc                  | 5'- CTG CTA ACG ACA TTT ACA ACG AGC -3' | 5'- CGA ATG TGT ACA TGC TCT GGA AGC -3' |

### **Absolute quantification mRNA abundance (ERCC-RNA-seq)**

#### RNA extraction and ERCC control spike-in

Activated WT B cells were prepared as described.  $3 \times 10^6$  cells were harvested at indicated time points (naïve, 1.5h, 4.5h, 13.5hr and 25.5hr). We determined the amount of ERCC control needed to cover the whole dynamic range of endogenous mRNA abundance at each time point in a pilot experiment, and added the following amounts of ERCC control into  $3 \times 10^6$  cells before RNA extraction: naïve, 1uL or 0.1uL; 1.5h and 4.5h, 0.5uL; 13.5hr, 1uL; and 25.5hr, 2uL. Note that ERCC control contains a mix of 92 exogenous RNAs of various length and GC content as well as abundance that spans six orders of magnitude [4]. Total RNA was extracted using the RNeasy Mini Kit (Qiagen, 74104) according to manufacturer's instructions and poly(A) containing mRNA species were further isolated before sequencing analysis.

## RNA deep sequencing and data analysis

100bp reads were generated by the HiSeq Analyzer 2000 at the TSRI Next Generation Sequencing Core. The Genome Analyzer Pipeline Software (currently Casava v1.8.2) was used to perform the early data analysis of a sequencing run, which does the image analysis, base calling, and demultiplexing. The program called cutadapt (<http://journal.embnet.org/index.php/embnetjournal/article/view/200/479>) was used to trim the adapter and low-quality ends. The remaining reads shorter than 35bp were filtered out. For mRNA-Seq alignment, TopHat v2.0.8b (<http://tophat.cbc.umd.edu/>) with Bowtie2 was used to align the reads to genome using the genome reference (mouse mm10) with very sensitive alignment and other default parameters. Bowtie2 was used to align the reads to the ERCC sequences and then the coverage was quantitated with bedtools (<http://code.google.com/p/bedtools/>) software. Partek Genomics Suite 6.6 (Partek Inc., St. Louis, MO, USA, <http://www.partek.com/>) was used to quantitate the exon/gene counts. Linear model fitting plots of log<sub>2</sub> RPKM values of ERCC to log<sub>2</sub> ERCC copy numbers were further generated with ggplot2 packages in R, using detected ERCC control mix in each replicates separately. Log<sub>2</sub> RPKM values of endogenous mRNA were directly converted to log<sub>2</sub> copy number per cell using the equation of the plot. Genes were discarded from analysis when the calculated mRNA copy number per cell was lower than 0.5.

## Microarray

B cells were purified and activated as described. Total RNA was extracted using the RNeasy Mini Kit (Qiagen, 74104). Microarray analysis was performed at the TSRI DNA Array Core Facility using the Affymetrix GeneChip Mouse Gene 1.0 ST Array or the Affymetrix GeneChip Mouse Gene 1.1 ST Array. Data normalization was performed using RMA Express 1.0 (<http://rmaexpress.bmbolstad.com>) with quantile normalization, median polish and background adjustment. The Limma package in the R

software was used to find transcripts with differential expression. The fold changes and standard errors were estimated by fitting a linear model for each gene and empirical Bayes smoothing was applied to the standard errors. Results are presented between two or more experimental conditions as a fold change in expression level, the moderated t-statistic, the p-value, and the adjusted p-value. The adjusted p-value is the p-value adjusted for multiple testing using the Benjamini and Hochberg's method to control the false discovery rate of 0.1 or less. The transcripts identified as differentially expressed were those with fold changes more than 1.4 fold. Microarray data reported in the paper have been deposited in NCBI Gene Expression Omnibus. The GEO accession number is GSE56379.

### **Polysome profiling and Poly-RNA-seq analysis of primary B cells**

$0.8 - 1.2 \times 10^8$  B cells were purified from 6-8 mice and activated with LPS and IL-4 for 25.5 hours as described. Fifteen minutes before harvesting, cells were treated with 100 $\mu$ g/ml of cyclohexamide (CHX) to block ribosome elongation during extraction preparation. Cells were first swelled in 10ml of hypotonic buffer (1.5ml KCl, 10mM MgCl<sub>2</sub>, 5mM Tris-HCl pH 7.4, and 100 $\mu$ g/ml cyclohexamide), and cytosolic fractions were extracted with total 600ml of 1:1 mix of hypotonic buffer and hypotonic lysis buffer (2% sodium deoxycholate, 2% Triton X-100, 2.5mM DTT, 10 units of RNase Inhibitors/ml, and 100 $\mu$ g/ml cyclohexamide). After 20 minutes of incubation on ice, nuclei were removed by centrifugation at 2,300g for 10 minutes. Supernatant was centrifuged through 15%-45% (w/w) of RNase inhibitor-containing sucrose gradients at 40,000 rpm for 1.5 hours using a Beckman SW41 rotor. The resulting gradient was separated into 20 fractions from top and A254 was monitored with recording spectrophotometer in parallel. Equal amounts of exogenous RNA control (Thermo Scientific, Solaris RNA spike control, K-002200-C1) were directly added into each fraction, and total RNA was extracted using TRIzol-LS solution following manufacturer's instructions. The first cDNA strand was synthesized by reverse transcription using a primer mix of oligo-dT and random hexamers

following manufacturer's instructions (Bio-Rad 170-8890). Quantitative PCR was performed as described. CT values were normalized to the spiked-in Solaris RNA to control for any technical variations that might occur during RNA extraction, cDNA synthesis, and PCR steps. Smoothing lines were generated using Prism (GraphPad Software Inc) with smoothing option (two neighbor to average and 2nd order of smoothing polynomial) using the average "% of total" value of technical replicates generated from a representative biological replicate.

RNA-seq analysis of polysome profiling samples (Roly-RNA-seq) were prepared in a same way, but only fraction 10-11 (corresponding to fractions associated with 3-4 ribosomes) and fraction 14-16 (corresponding to more than 7 ribosomes) were collected for calculating RPKM ratio of fraction 10-11 to fraction 14-16 of miRNA targets. Total RNA was extracted using Trizol-LS solution according to manufacturer's instruction and RNA abundance was calculated as described.

### **miRNA qRT-PCR**

Total RNA from each sucrose gradient fraction was extracted as described above. After total RNA were eluted using the same volume of water for each fraction, equal volume of extracted RNA from each fraction was used to synthesize miRNA specific cDNA following manufacturer's instructions (Applied Biosystem, 4366596) with the following RT primers (Applied Biosystem, 4437975: miR-17, ID-002308; miR-18a, ID-002422; miR-19b, ID-000396; miR-92, ID-000430; let-7a, ID-000377; and miR-21, ID-000397). Equal volumes of the RT reaction products were used for quantitative PCR following manufacturer's instructions (Applied Biosystem, 4440040) using RT-primer matched Taqman Small RNA assay (Applied Biosystem, 4427975).

### **Ribosome profiling analysis of primary B cells**

#### Ribosome footprint library generation



Ribosome footprint library were generated as previously described with modifications [5, 6]. Major modifications are: (1) Used RNA purified from cytosolic fractions, instead of whole cell lysate with DNase treatment procedure [6]. (2) RNase I treated footprints were purified using sucrose gradient and excluded disome fractions [5], instead of the sucrose cushion method [6]. (3) rRNAs were depleted using rRNA depletion kit (Epicentre RZH110424 or Epicentre MRZH11124) after footprint recovery and before the dephosphorylation and linker ligation steps. Indexed footprint library was generated with 4 or 6 cycles of PCR using index library primers, and avoided broad, slower migrating smear bands [6]. Numbers of cycles were increased only when 4 to 6 cycles did not give enough PCR products for downstream sequencing analysis.

Index library primers used in this study [6]:

Barcode\_Reverse\_01\_ACGACT 5'-  
caagcagaagacggcatacagatAGTCGTgtgactggagttcagacgtgtgctcttccgatct-3'

Barcode\_Reverse\_02\_ATCAGT 5'-  
caagcagaagacggcatacagatACTGATgtgactggagttcagacgtgtgctcttccgatct-3'

Barcode\_Reverse\_03\_CAGCAT 5'-  
caagcagaagacggcatacagatATGCTGgtgactggagttcagacgtgtgctcttccgatct-3'

Barcode\_Reverse\_04\_CGACGT 5'-  
caagcagaagacggcatacagatACGTCGgtgactggagttcagacgtgtgctcttccgatct-3'

Barcode\_Reverse\_05\_GCAGCT 5'-  
caagcagaagacggcatacagatAGCTGCgtgactggagttcagacgtgtgctcttccgatct-3'

Barcode\_Reverse\_06\_TACGAT 5'-  
caagcagaagacggcatacagatATCGTAgtgactggagttcagacgtgtgctcttccgatct-3'

Barcode\_Reverse\_07\_CTGACG 5'-  
caagcagaagacggcatacagatCGTCAGgtgactggagttcagacgtgtgctcttccgatct-3'

Barcode\_Reverse\_08\_GCTACG 5'-  
caagcagaagacggcatacagagatCGTAGCgtgactggagttcagacgtgtgctcttccgatct-3'

Barcode\_Reverse\_09\_TGCAGC 5'-  
caagcagaagacggcatacagagatGCTGCAgtgactggagttcagacgtgtgctcttccgatct-3'

### Differential expression analysis of ribosome footprints

We followed the previously described analysis scheme [6]. Briefly, the raw sequencing data were separated into individual samples using index primer sequences. Then, the miRNA linker and the first nucleotide of 5'-end are clipped and trimmed using fastx toolkit ([http://hannonlab.cshl.edu/fastx\\_toolkit/](http://hannonlab.cshl.edu/fastx_toolkit/)). Reads obtained from rRNAs are discarded using Bowtie v1.0.0 using 23 seed flag [7]. Illumina iGenome (mm10) were used as a reference. The non-rRNA sequencing reads were further aligned to the reference genome (mm10) using TopHat v2.0.11 with added option, "no-novel-juncs" [8]. Only the perfect-match aligned reads were further extracted from accepted hits (accepted\_hits.bam) to reduce potential noise derived from relatively short ribosome footprint length [6]. Differential ribosome footprint levels in different genotypes were further quantified using Cuffdiff (v 2.2.1) [9, 10]. To accept only translated genes, we took cut-off of ribosome footprints at fragments per kilobase per million (FPKM) > 1, and only selected genes that were quantified in all three biological replicates. This cut-off includes all 48 target proteins detected in Immunoblot or FACS analysis (A list of targets detected and quantified by immunoblot and FACS can be found in **Supplemental Table 3**).

### Ribosome footprint coverage plot

Footprint reads were aligned to exon regions of a unique, canonical transcript defined by KnownCanonical geneset from UCSC genome browser using CoverageBed operation of BEDtools suite [11]. "-split" flag was used to include reads that were split by spliced regions. Coverage values of

each nucleotide position was divided by read counts of a given gene of individual samples to normalize area under footprint coverage to reveal ribosome distribution changes inter-gene levels independent from overall ribosome quantity changes found in miRNA target genes among different genotypes [12]. They were further aligned by start codon or stop codon and averaged values of biological triplicates of each nucleotide position of given gene was compared. Coverage plot of a set of genes (i.e. 641 miR-17~92 targets) are generated from trimmed average (10%) values of the coverage values from each nucleotide position.

#### Estimation of relative contribution of translation changes and mRNA changes, and calculation of ribosome density

Impact of miRNAs on transcribed target mRNAs were directly measured by comparing relative mRNA abundance determined by microarray ( $\log_2[\text{mRNA}_{\text{miR}}/\text{mRNA}_{\text{WT}}]$ ). Impact of miRNAs on translation efficiency (termed Translation) was estimated by comparing normalized ribosome footprint abundance (FPKM) to the mRNA level changes ( $\log_2[\text{Rib}_{\text{miR}}/\text{Rib}_{\text{WT}}] - \log_2[\text{mRNA}_{\text{miR}}/\text{mRNA}_{\text{WT}}]$ ). Ribosome density of WT were calculated by comparing the normalized ribosome footprint abundance (FPKM) from ribosome profiling to absolute mRNA levels from ERCC-RNA-seq in WT B cells ( $\log_2[\text{Rib}_{\text{WT}}/\text{mRNACopy}_{\text{WT}}]$ ). Ribosome density of other genotypes (i.e. TKO or TG) was estimated by relative mRNA changes between different genotypes and normalized ribosome footprint abundance (FPKM) measured by Ribosome profiling in different genotype ( $\log_2[\text{Rib}_{\text{miR}}/\text{mRNACopy}_{\text{WT}}] - \log_2[\text{mRNA}_{\text{miR}}/\text{mRNA}_{\text{WT}}]$ ).

#### **Calculation of 5'UTR, CDS and 3'UTR length**

The reference sequence (RefSeq) database including gene accession ID and exon start/stop sites were downloaded from UCSC genome browser (<http://genome.ucsc.edu/>, Assembly Hg19). To analyze length of UTR and CDS of messenger RNAs, datasets only starting from prefix 'MN\_' were extracted.

Then the length of each exon was summated if single accession ID consists of multiple exon regions. When multiple RefSeq accession ID corresponds to single gene, only a representative value was selected for a unique gene value. The resulting length distribution was plotted using Prism (Graph Pad Software Inc) or “ggplot2” package in “R”.

### **5'UTR GC contents and structures**

Murine 5'UTR sequences were retrieved from Ensembl BioMart database (Ensembl Genes78, *Mus musculus*). Aligned 5'UTR sequence from its 3'-end, cropped the 100 nucleotides (nts), and discarded sequences longer than 100nt. Occurrence of GC% of given genesets was calculated in each nucleotide position and generated loess smooth line using ggplot2 package in R with `stat_smooth()` function (`span=0.2`).

5'UTR secondary structures and free energy of nucleotide positions were predicted by directly querying the whole 5'UTR sequences of individual mRNAs into RNAfold. The centroid secondary structure was presented in the figure (<http://rna.tbi.univie.ac.at/cgi-bin/RNAfold.cgi>) [13]. The murine CD69 5'UTR sequence used in this study is:

*Murine CD69 5'UTR* (ENSMUSG00000030156)

5'ACUGAACAAGACAGCUCCAGCUACAUCUCUCCGUGGACCACUUGAGAGUCGCCAGGG  
ACCUUGAGGGGAAAAAAAAAUUAAAAAGG-3'

### **Cloning of the 3'UTR and 5'UTR of target genes**

Fragments of target 3'UTRs were cloned into psiCHECK<sup>TM</sup>-2 Vector using the XhoI and NotI enzyme sites in the multiple cloning region and miR-17~92 binding sites were mutated as previously described [14]. For *CD69*, the murine *CD69* 5'UTR and its variants were additionally clone into a position downstream to the SV40 promoter and upstream of hRluc, thereby generating a hRluc reporter gene

flanked by the engineered 5'UTR and 3'UTR. The sequence downstream to the transcription start site (TSS) of the SV40 promoter was trimmed to minimize the number of additional nucleotides in the engineered 5'UTRs. The TATA box and Kozak sequence remain intact. The 5'UTR sequences were synthesized by IDT (Integrated DNA technology) and cloned into the psiCheck2 vector.

### ***Cloned 3'UTR***

*Underlined sequences and bolded sequence indicate miR-17~92 binding sites and their mutations, respectively.*

*CD69 (936 nts):*

TAACTGGATACTGCTCTGCAGTTGAATTTTCCACAAAGACTGCACAAACCAACTTTACATC  
ATCCTGGATCAACTCCAGATAGAACTGTGGGACATGAGGAAGAAGATCCAGGAAGATCC  
CTTGACCAGGAGCTGAAACTGTCACCAACTGACTGCTAATCACATCAAGGATGAGAGGAT  
GGCTATGAAGCCTCATCAACGCACTTTATTTTTTTTTTAAACCTAGAATGAATAGAACTGAC  
TAGCTCTAGAGTTACTATTTATTGCCGAATGACTGCTACAGCCAGTGCCTTTACGCATTTG  
CACTATTTGGAGGGGTTTCAGTGGTAGGAAGAGCTGAATGTAGGTACAGGAAGATTTGAC  
TGATTAATGATTTTCTTAAATTCAAAAAGCATTACAAAATAGAACAATGCTTATGAAACC  
AAGCTTTGCAGTAACTCCATCTATTTACAGAAACTTTGCCTCATTATTTTGTCAATTGTTCT  
CCCCCAAAGAATAAGAGTGGCCTTTTCTTTAACTTCCTCCGTGTAGACAGCTAATTTTCAA  
TGGTACATATTTCTTAACCTTTAAAAACCTCTGTAGCGTATTTCAAGGAAGAAAACAAAA  
GCACAGCATATGAGTAATATTTGTAGAGCAGATTTCAAAGTGCTGGAAAGAAAAGTGCAA  
TACGTGTAGTGGCAGATCTCTGTCAGGACACACCCTGTGGTTTGACCTTGAATAACTCCA  
GTCTTGTACATAACCTGTTTGTGTCTTTCCAGTCCTTTGTCCAAAATATTTCCCATGTGC  
AATAAAGTGTTTATATATTTGTTTGTGTTTTAAAACCCACTATAAAGTTTAAGCTGTTTC

*Mutated CD69 (936 nts):*

TA ACTGGATACTGCTCTGCAGTTGAATTTTCCACAAAGACTGCACAAACCAACTTTACATC  
ATCCTGGATCAACTCCAGATAGA ACTGTGGGACATGAGGAAGAAGATCCAGGAAGATCC  
CTTGACCAGGAGCTGAAACTGTCACCAACTGACTGCTAATCACATCAAGGATGAGAGGAT  
GGCTATGAAGCCTCATCAACGAAGTCTATTTTTTTTTTAAACCTAGAATGAATAGA ACTGA  
CTAGCTCTAGAGTTACTATTTATTGCCGAATGACTGCTACAGCCAGTGCCTTTACGCATTT  
GCACTATTTGGAGGGGTTTCAGTGGTAGGAAGAGCTGAATGTAGGTACAGGAAGATTTGA  
CTGATTAATGATTTTCTTAAATTCAAAAAGCATTACAAATAGAACAAATGCTTATGAAACC  
AAGCTTTGCAGTAACTCCATCTATTTACAGAACTTTGCCTCATTATTTTGTCAATTGTTCT  
CCCCAAAGAATAAGAGTGGCCTTTTCTTAACTTCCTCCGTGTAGACAGCTAATTTTCAA  
TGGTACATATTTCTTAACTTTAAAAACCTCTGTAGCGTATTTCAAGGAAGAAAACAAAA  
GCACAGCATATGAGTAATATTTGTAGAGCAGATTTCAAAGTGCTGGAAAGAAAAGCGAA  
GTACGTGTAGTGGCAGATCTCTGTCAGGACACACCCTGTGGTTTGACCTTGGAATAACTCC  
AGTCTTGTACATAACCTGTTTGTGTCTTTCCAGTCCTTTGTCCAAAATATTTCCCATGCG  
AAGTAAAGTGTTTATATATTTGTTTGTGTTTTAAAACCCACTATAAAGTTTAAGCTGTTTC

*Lats2 (635 nts):*

CTTTTCAGAAGACAAACTCAAGCTTAGGAATCCTTCATTTTTAGTTCTGGTAAATGGGCAA  
CAGGAAGAGTCAACATGATTTCAAATTAGCCCTCTGAGGACCTTCACTGCATTA AACAG  
TATTTTTAAAAAATTAGTACAGTATGGAAAGAGCACTTATTTTGTGGATACCCATCTTTTT  
CTTACTAAATTATAAGGACTGACTGTGAGAAACCATGCTGCTGTTATTTCCATGTGTGTTG  
TATCTGATAGCACTTGTCCACAGCTAGAAAAGGAAGAGCTGGAGAGCGTGAGGCAAGAC  
GTCTGTGCAATAAGAGAGGATGAGGCGACGGAGCTCTGCTCAAGTCACGAGGACCGCTTA

TCTACACAGTGGCTTAGTTTTGTATTTTCCCACATTTCAAATTGTGATGTAATGTTTGAAAG  
CTGCTTTTGTATTTTCTCCTTTGCATATTATAGTTCCTAGAAAGAGTGAGCAGAGAGCTGG  
TGGGTGTGACTCCGGTGTCTGGTGTGGAGAGTACTGCATGAGCAGGGGTTTCTAGTATAA  
AATACCGTATCTTGCCATTCACAGCAGGTCCTGTGAATACGTTTTTAAATGAGGTATTCTA  
GACAGTGTGCTGATAATGTATTGTGTGGA

*Mutated Lats2 (635 nts):*

CTTTTCAGAAGACAAACTCAAGCTTAGGAATCCTTCATTTTTAGTTCTGGTAAATGGGCAA  
CAGGAAGAGTCAACATGATTTCAAATTAGCCCTCTGAGGACCTTCACTGCATTA AACAG  
TATTTTTAAAAAATTAGTACAGTATGGAAAGACCTCATATTTTGTGGATACCCATCTTTTT  
CTTACTAAATTATAAGGACTGACTGTGAGAAACCATGCTGCTGTTATTTCCATGTGTGTTG  
TATCTGATACCTCATGTCCACAGCTAGAAAAGGAAGAGCTGGAGAGCGTGAGGCAAGAC  
GTCTGAGGATTTAGAGAGGATGAGGCGACGGAGCTCTGCTCAAGTCACGAGGACCGCTT  
ATCTACACAGTGGCTTAGTTTTGTATTTTCCCACATTTCAAATTGTGATGTAATGTTTGAAA  
GCTGCTTTTGTATTTTCTCCTTTGCATATTATAGTTCCTAGAAAGAGTGAGCAGAGAGCTG  
GTGGGTGTGACTCCGGTGTCTGGTGTGGAGAGTACTGCATGAGCAGGGGTTTCTAGTATA  
AAATACCGTATCTTGCCATTCACAGCAGGTCCTGTGAATACGTTTTTAAATGAGGTATTCT  
AGACAGTGTGCTGATAATGTATTGTGTGGA

*Rb1 (669 nts):*

GAAACAGATTGTTACAAACTGGGAAAAAGTACTAATTTCTACACATTGGACTATTTTAAT  
ATTAGAATCTAATGTGCCGTGTGTTTGTTCACATATTTTACTTTTGAAATACAAGCAAAA  
AAAGTATAATCATATGATACTGTCTTACTACTGACACAGATTTTCATACCTCAGACCCTCTA  
AGAACCGATTCTTTTATTCACCCAACACATGCTTTGAACTGAAGACTATTGATAATACTCC  
GAGGTTGTTTTTTTCTTTCAATCATTTCAGATCACTGAATTTATAAGTACCCATGTAGTACTT

GAAAGTCAAGTTTGGCCACAACCTGTGCTTAAGAGGACCCTAGTACAGTACAACCCAAGTG  
CACTTTTTAATGTTTCTGGGTCCTGAAGAATCAAGATACAAATTAATTGTGATTTACAAGC  
AGACTGTAACTATAGAAGCCTTCAGTTTTTTCCCTCATAGACGTGTCTAATTACATCTC  
AACAGTTTACTCTGTTCTTCTACATCTGGGGATGTTTGTGTTCTCTCTGGAATGGTACATCT  
TCCAGGGTCTTTTGAACCTGCAGTTATCTATTTTTTAAGCCAATCTGGTCTAATAACTCTGG  
CTTCTTCAAAGCCACACCATTCTAGTCCAGCTGTGCAGAACTTCAGATGAAAACAG

*RbI (669 nts):*

GAAACAGATTGTTACAAACTGGGAAAAGTACTAATTTCTACACATTGGACTATTTTAAT  
ATTAGAATCTAATGTGCCGTGTGTTTGTTCACATATTTTACTTTTGAATACAAGCAAAA  
AAAGTATAATCATATGATACTGTCTTACTACTGACACAGATTCATACCTCAGACCCTCTA  
AGAACCGATTCTTTTATTCACCCAACACATGCTTTGAACCTGAAGACTATTGATAATACTCC  
GAGGTTGTTTTTTCTTTCAATCATTTCAGATCACTGAATTTATAAGTACCCATGTAGTACTT  
GAAAGTCAAGTTTGGCCACAACCTGTGCTTAAGAGGACCCTAGTACAGTACAACCCAAGTG  
GAGTATTTAATGTTTCTGGGTCCTGAAGAATCAAGATACAAATTAATTGTGATTTACAAG  
CAGACTGTAACTATAGAAGCCTTCAGTTTTTTCCCTCATAGACGTGTCTAATTACATCTC  
AACAGTTTACTCTGTTCTTCTACATCTGGGGATGTTTGTGTTCTCTCTGGAATGGTACATCT  
TCCAGGGTCTTTTGAACCTGCAGTTATCTATTTTTTAAGCCAATCTGGTCTAATAACTCTGG  
CTTCTTCAAAGCCACACCATTCTAGTCCAGCTGTGCAGAACTTCAGATGAAAACAG

*SosI (619 nts):*

TTCCTCTAAGCTGGGATAGTTTCCTAGCCCCAGATCCATTGCTGGCAATGGATGCACTGA  
ACATGCCAGCACTGGGGAGTTCAAATGAGAACTCCAAACACTAACGACTCTACTTCACGA  
TGTAGTATAAGACAATGAGTTTTAACCTACATGGAATTATGGAATAAAATGGTATTCCAG  
CTTAGAATGTGGAAACTGATTGACCTGGAAATCACGTGAAGGGACTTTTCTGGCCATTG



GGCAGGAGTCCTCATATTGTGAAGTGATCTTTATCATTAAAGGGATGGAAAACAGTCTAA  
TGTCCAACAAGCCCATATGTTGACAGTTTTTTGTAATTCAAATATTATGCACTTTTAAAAA  
ATCTTAAACAGGGATCTCCTCCTTTGTTTTCTTTGCTTTACTCTTCTACTTTAGAATATTTT  
CGTAAAAGTTATTCAGAGGACTGTGAGAAAAGGCTGTGGTACCTGACCTTGTGAAATCA  
AGGCCCAGCACTGTACTACAGTCCTGTTTACAGATTATTACAGTGATCTGAATGGGTACCG  
AGGCTTCACCAAAGAGGTACTIONTTTTGTTATTGTTATTGTTTTAAGAATAATTATGCCAATTT  
TAAGAACATCC

*Mutated Sos1 (619 nts):*

TTCCTCTAAGCTGGGATAGTTTTCTAGCCCCAGATCCATTGCTGGCAATGGATGCACTGA  
ACATGCCAGCACTGGGGAGTTCAAATGAGAACTCCAAACACTAACGACTCTACTTCACGA  
TGTAGTATAAGACAATGAGTTTTAACCTACATGGAATTATGGAATAAAATGGTATTCCAG  
CTTAGAATGTGGAAACTGATAGGAGCTGGAAATCACGTGAAGGGACTTTTCTGGCCATTG  
GGCAGGAGTCCTCATATTGTGAAGTGATCTTTATCATTAAAGGGATGGAAAACAGTCTAA  
TGTCCAACAAGCCCATATGTTGACAGTTTTTTGTAATTCAAATATTATGGAGTATTAAAAA  
ATCTTAAACAGGGATCTCCTCCTTTGTTTTCTTTGCTTTACTCTTCTACTTTAGAATATTTT  
CGTAAAAGTTATTCAGAGGACTGTGAGAAAAGGCTGTGGTACCTGACCTTGTGAAATCA  
AGGCCCAGCACTGTACTACAGTCCTGTTTACAGATTATTACAGTGATCTGAATGGGTACCG  
AGGCTTCACCAAAGAGGTACTIONTTTTGTTATTGTTATTGTTTTAAGAATAATTATGCCAATTT  
TAAGAACATCC

*Dusp2 (535 nts):*

ACAGCTCTGGCTTTGACTGACTCCTGGGGGAAGCTGCTGTGGCCAGCTCCTCCCTCCTCA  
TCTTGCCGTCCCAGTGGGGTGCTAGGAAATCCAGGATGACGGCTGCTCTGATATGGTGCTC  
TTCTGAGGTGGCATAAGGGCTGGCCCTTATTTGCTCTCCCTCCTTCGACTTGCAGAAATTA

ATTTAATTAATTAATTTACTATATTAAGCCCTTGGTCACCCAAGGGCTCAGAAAACAAGC  
TGTGACAAGCAGAAACCATGTCTAGGGGTGTGCAGCCCTTGACCCAAGCTTAAGCCTTG  
TGCTCCCAGGGGAGCCAGGAAGTGACGTGTGTGTCATGTTACGGACATCTGACTTTTGTGT  
GTGTGTGTGTGGGCATCTCGCTGTAATTGGTGCTGAAAAGTTATTTGTGTTCAACTGACAT  
TTAACGCTCTCTCCCCAACTTCCTCCCGGCCCTGTGGGCCAGGGAGGGGCGTTGGAAACA  
GCACTTTATATTTATATAGAACATTGAGGTTGTGTCAATAAAAACAGTG

*Mutated Dusp2 (535 nts):*

ACAGCTCTGGCTTTGACTGACTCCTGGGGGAAGCTGCTGTGGCCCAGCTCCTCCCTCCTCA  
TCTTGCCGTCCCCTGACTGGGGTGCTAGGAAATCCAGGATGACGGCTGCTCTGATATGGTGCTC  
TTCTGAGGTGGCATAAGGGCTGGCCCTTATTTGCTCTCCCTCCTTCGACTTGCAGAAATTA  
ATTTAATTAATTAATTTACTATATTAAGCCCTTGGTCACCCAAGGGCTCAGAAAACAAGC  
TGTGACAAGCAGAAACCATGTCTAGGGGTGTGCAGCCCTTGACCCAAGCTTAAGCCTTG  
TGCTCCCAGGGGAGCCAGGAAGTGACGTGTGTGTCATGTTACGGACATCTGACTTTTGTGT  
GTGTGTGTGTGGGCATCTCGCTGTAATTGGTGCTGAAAAGTTATTTGTGTTCAACTGACAT  
TTAACGCTCTCTCCCCAACTTCCTCCCGGCCCTGTGGGCCAGGGAGGGGCGTTGGAAACA  
GGAGTATTTATTTATATAGAACATTGAGGTTGTGTCAATAAAAACAGTG

*Rapgef2 (BS-1 & 2) (773 nts):*

CTTCTTCTCCCCTTCTTCCCTTCCCCTTTGCATGTGAAATACTGTGAAGAAATTGCCCTGGC  
ACTTTGCAGACTTGTTGCTTGAAATGCACAGCCCAGCAGCCCCTGAGCTGCTGCCTGCCAC  
GTCACGCAGTATCATTCCAAATTCCAAGATCGTCACAAGGCGATTCCCTCTGGCGGCCCTT  
CTCCATGCCTGGAAGGAGATTCCAATCTTCCCTTTAGATTTCAATCCAGTCCTAGCCCTCG  
ATCTCATTTGGAAGATGAGAAAAGCTAGCCTTTGAACTACCCGGGGTCTCGAACCCACCA  
AGGAAGACAAAGACTGATATGAAATCCTTTGAGTACAGTGCTTGTCCACTTGTTTACAAT

ATCCTTTAAAAAAAATAAGTTTAAAGATTGTGTTTCAGAGAGTAAATGTTATATCCATTTT  
ATGATTACAGTATTATTTTGAACCTTAAGTAGGATTGCCAGCCTGGGTTTCTGAAAAACCA  
AATATGCCGGACAGGGTTTGGCCGCACCAAGGGAAGACCTGGGCAGTGACCCTGTCTTCC  
CATGTCCTTCTGGCCTTGCCCGTGAAGTGCCCTATCCCAGAAGCATCAAACGTTAGCCAAT  
TACTTAAATACCAAGACTCCTCACCTGCCCTTCCCCAGTGGGTGAGGCTCTAATGTAAAA  
CAGTTTGCACATGGCCAGGGGAGGGAAGTACTAGGACTTGTGTGTCCTGTCTGAGCCTTATGA  
GGCAGGATGGTGTATTTTAAGAGTGTGTCCTGCTCAATTACAAT

*Mutated Rapgef2 (BS-1 &2) (773 nts):*

CTTCTTCTCCCCTTCTTCCCTTCCCCTTTCATGTGAAATACTGTGAAGAAATTGCCCTGGG  
AGTATGCAGACTTGTTGCTTGAAATGCACAGCCCAGCAGCCCCTGAGCTGCTGCCTGCCA  
CGTCACGCAGTATCATTCCAAATTCCAAGATCGTCACAAGGCGATTCCCTCTGGCGGCCCT  
TCTCCATGCCTGGAAGGAGATTCCAATCTTCTCTTAGATTTCAATCCAGTCCTAGCCCTC  
GATCTCATTGGAAGATGAGAAAAGCTAGCCTTGAAGTACCCGGGGTCTCGAACCCACC  
AAGGAAGACAAAGACTGATATGAAATCCTTTGAGTACAGTGCTTGTCCACTTGTTTACAA  
TATCCTTTAAAAAAAATAAGTTTAAAGATTGTGTTTCAGAGAGTAAATGTTATATCCATTT  
TATGATTACAGTATTATTTTGAACCTTAAGTAGGATTGCCAGCCTGGGTTTCTGAAAAACC  
AAATATGCCGGACAGGGTTTGGCCGCACCAAGGGAAGACCTGGGCAGTGACCCTGTCTTC  
CCATGTCCTTCTGGCCTTGCCCGTGAAGTGCCCTATCCCAGAAGCATCAAACGTTAGCCAA  
TACTTAAATACCAAGACTCCTCACCTGCCCTTCCCCAGTGGGTGAGGCTCTAATGTAAA  
ACAGTATCCTCATGGCCAGGGGAGGGAAGTACTAGGACTTGTGTGTCCTGTCTGAGCCTTATG  
AGGCAGGATGGTGTATTTTAAGAGTGTGTCCTGCTCAATTACAAT

*Rapgef2 (BS-3 &4) (731 nts):*

GGCACCAGAGAGTATGTCTTTAAACATGATTAAGGTCACAAACATGGTTAAATACGCCA  
GCCTTTGCAAAATGGTTAGTCACCAAAGGCTGACCTGTAAGTGGCTTTGGGGACGCTGCA  
TATGGAGAAGGCCAAGTGTAGCGCCCGTCTGCTCATAGCTGCTGCTAGCCCTAGAATGAC  
TGAAAATGACCCCGCCGGTCTATTCTTGTGTTGTTTTGACAGACTCCGGAAAAGTGAAG  
GCTGCCAATCCGAGTAGTACTCAGATGTGAGGGGCTGCTGATCTTGGATTTTTCCATTA  
TTCAGCTGATCATATTGATCAGTAGATAAACGTAAATAGCTTCAAATTTTAAAGGTCGAAT  
TGCAGTGTTTTTTCAGTGTGTCAAACAATGTCAGTGCTTTATTTAATAATTCTCTTCTATGT  
CATGGCGTTTGTCTACTTGTGTATCACATTGTCACTTACGCATTTGTAATTTCCATGTAAT  
ATGCATTATTGCCAGTTTTACTCTATAGGCTATGGACCTCATGTGCATATAGAAAGACAAA  
CCTCTAGCTCTACCACAAATTGACAGATGTTATCTAAGCATTAAAGTAATTGTAGAACATA  
GGACTGCTAATCTCAGTTCGCTCTGTGATGTCAAGTGCAGAATGTACAATTAAGTGGTGAT  
TTCCTCATGCTTTTGATAACCACTTGTACCTGTATGTCTTTTAGAAAGACATTGGTGGAGTC

*Mutated Rapgef2 (BS-3&4) (731 nts):*

GGCACCAGAGAGTATGTCTTTAAACATGATTAAGGTCACAAACATGGTTAAATACGCCA  
GCCTTTGCAAAATGGTTAGTCACCAAAGGCTGACCTGTAAGTGGCTTTGGGGACGCTGCA  
TATGGAGAAGGCCAAGTGTAGCGCCCGTCTGCTCATAGCTGCTGCTAGCCCTAGAATGAC  
TGAAAATGACCCCGCCGGTCTATTCTTGTGTTGTTATCCTCAGACTCCGGAAAAGTGAAG  
GCTGCCAATCCGAGTAGTACTCAGATGTGAGGGGCTGCTGATCTTGGATTTTTCCATTA  
TTCAGCTGATCATATTGATCAGTAGATAAACGTAAATAGCTTCAAATTTTAAAGGTCGAAT  
TGCAGTGTTTTTTCAGTGTGTCAAACAATGTCAGTGCTTTATTTAATAATTCTCTTCTATGT  
CATGGCGTTTGTCTACTTGTGTATCACATTGTCACTTACGCATTTGTAATTTCCATGTAAT  
ATGCATTATTGCCAGTTTTACTCTATAGGCTATGGACCTCATGTGCATATAGAAAGACAAA  
CCTCTAGCTCTACCACAAATAGGAGAGATGTTATCTAAGCATTAAAGTAATTGTAGAACAT  
AGGACTGCTAATCTCAGTTCGCTCTGTGATGTCAAGTGCAGAATGTACAATTAAGTGGTG

ATTCCTCATGCTTTTGATACTTGTACCTGTATGTCTTTTAGAAAGACATTGGTGGAGT  
C

*Mink1 (770 nts):*

CGAGGCCCTGGGCTGGGGCTCCCCACATGGACCCAGCTCTCTTCCCACAGCCAGACTAC  
CCAGGCCGCCCCTGCCCTCCCACCCCCTTGGGCTTTTGCTTTTACTGGTTTGATTCACTGGA  
GCCTGCTGGGAACGTGACCTCATATCCCTGAAGCTTTCGTGATCACGTGACCACCCTTCC  
CCCAACATTCTCAAACTGTGCCTTTCCCAACTTGTGGGGAATGACACAGCTTCCTTCCC  
CTTACCAGGAATTGAGTGGGACTTGCTCCTCCCCTTTTCTCCACAGAAGAGGAGAGCGCTT  
GGGGCTTGACCCCTTACCCATTGCTGCTGAATGAGCAGGGCCCTGACCCCTTTATTTGC  
ACGCCAGGGGAGCCGGCTCCCCCTTGAATGTACCAGACTCTGGGGGGGGGGTGTTCACT  
GGGCCCTGGGTTCTGGAGGCGGGGCGGTCACCAGCCACTCCAGGGGCAGGGACCATTCTT  
CATTTTCTGAAAGCACTTTAATGATTCCCCCCAACCCCAGGGAATGGAGGAGGGACCC  
CATAGCCAAAACATTCCCCCTTTCCTCCCCACTCCCACCCCTTCTAGCCTCTCCCCTTCCC  
TAGAAGGAGAGAGCTCAGAGCTCCAGCCTTTATCCTCCCTTGCTTGCATCTGTATATAGT  
GTGAGCAGCAAGTAGCCCTTCTCCCTCCTGTATCCTTTCTCAATGTAGTGGCCTTGGATAT  
ATCCCCTTTGTTAATAAAGACAATTCAACCAGCTTCCACC

*Mutated Mink1 (770 nts):*

CGAGGCCCTGGGCTGGGGCTCCCCACATGGACCCAGCTCTCTTCCCACAGCCAGACTAC  
CCAGGCCGCCCCTGCCCTCCCACCCCCTTGGGCTTTTGCTTTTACTGGTTTGATTCACTGGA  
GCCTGCTGGGAACGTGACCTCATATCCCTGAAGCTTTCGTGATCACGTGACCACCCTTCC  
CCCAACATTCTCAAACTGTGCCTTTCCCAACTTGTGGGGAATGACACAGCTTCCTTCCC  
CTTACCAGGAATTGAGTGGGACTTGCTCCTCCCCTTTTCTCCACAGAAGAGGAGAGCGCTT  
GGGGCTTGACCCCTTACCCATTGCTGCTGAATGAGCAGGGCCCTGACCCCTTTATATCC

TCGCCAGGGGAGCCGGCTCCCCCTTGAATGTACCAGACTCTGGGGGGGGGGTGTTCACT  
GGGCCCTGGGTTCTGGAGGCGGGGCGGTCACCAGCCACTCCAGGGGCAGGGACCATTCT  
CATTTTCTGAAAGGAGTATAATGATTCCCCCCAACCCCAGGGAATGGAGGAGGGACCC  
CATAGCCAAAACATTCCCCCTTTCCTCCCCACTCCCACCCCTTCTAGCCTCTCCCCTTCCC  
TAGAAGGAGAGAGCTCAGAGCTCCAGCCTTTATCCTCCCTTGCTTGCATCTGTATATAGT  
GTGAGCAGCAAGTAGCCCTTCTCCCTCCTGTATCCTTTCTCAATGTAGTGGCCTTGGATAT  
ATCCCCTTTGTTAATAAAGACAATTCAACCAGCTTCCACC

*Fbxw7 (BS-1) (707 nts):*

AAAGCAGACATGATGAATTTTGTCCAAGTGTGTAGACAATATACTCCCTACCCTTCCCCCT  
GCGCAAAAAACAAAAACAAACAAACAAAAAATGAAAAAAAAAAACAGAAAAAAAAAA  
AGAGAAAAAAGAAAAGGAAAAAATCCCTTGTACTCAGTGGTGCAGGATGTTGGCTTGG  
GACAACAGACTGAAAAGACCTACAGACTAAGAAGGCAAGAAGAGACAAGAGACCGTAA  
CTGACAGGAGGCGGCAGCTGTCGCATCTCGCAAAGGCCTCACTTGTGACTGAGGGGCAGC  
TTGGCAAGACGACTCTCTAAATCCAACCAGGTGCAATTATTCTTTGTTTTCTTCTCCAGTG  
GTCATTGAGCAGAGCTACATCAGCGTTGTTACCGTCACCTAGAAAGGAGTGGCAGTAATA  
TCCAAACACGGGCTGCTTATCTTCTAATCAGAGCATCTGCAACAAACCGTCATTTTTCTGA  
AGTGGAAGCTTAAAACAATTACTGTGAATTGTTTTTGTACAGTTATCATGAAGCTTTCT  
TTTTTCTTTTTTCTGTTTCTTCTTTTCTTTTTTCTTTTTTTTTTTTGGCCAACCATTGCCA  
ATGTCAATCAATCACAGTATTAGCCTCTGTTAATCTATCTTTACTGTTGCTTCTACTCTT  
CAATGCATATGTTGCTCAAAGGTGGCAAGTTGTCCTGGGTTG

*Mutated Fbxw7 (BS-1) (707 nts):*

AAAGCAGACATGATGAATTTTGTCCAAGTGTGTAGACAATATACTCCCTACCCTTCCCCCT  
GCGCAAAAAACAAAAACAAACAAACAAAAAATGAAAAAAAAAAACAGAAAAAAAAAA

AGAGAAAAAAGAAAAGGAAAAAATCCCTTGTACTCAGTGGTGCAGGATGTTGGCTTGG  
GACAACAGACTGAAAAGACCTACAGACTAAGAAGGCAAGAAGAGACAAGAGACCGTAA  
CTGACAGGAGGCGGCAGCTGTCGCATCTCGCAAAGGCCTCACTTGTGACTGAGGGGCAGC  
TTGGCAAGACGACTCTCTAAATCCAACCAGGGAGGATTTATTCTTTGTTTTCTTCTCCAGTG  
GTCATTGAGCAGAGCTACATCAGCGTTGTTACCGTCACCTAGAAAGGAGTGGCAGTAATA  
TCCAAACACGGGCTGCTTATCTTCTAATCAGAGCATCTGCAACAAACCGTCATTTTTCTGA  
AGTGGAAAAGCTTAAAACAATTACTGTGAATTGTTTTTGTACAGTTATCATGAAGCTTTCT  
TTTTTCTCTTTTTCTGTTTTCTTCTTTTTCTTTTTTTTTTTTTTTTTTGCCAACCATTGCCA  
ATGTCAATCAATCACAGTATTAGCCTCTGTTAATCTATCTCTTTACTGTTGCTTCTACTCTT  
CAATGCATATGTTGCTCAAAGGTGGCAAGTTGTCCTGGGTTG

*Fbxw7 (BS-2) (513 nts):*

GAGGGCTGTGGTGAATGGAAGAACATACATAGCAAACTGACAAGATATTTTAAAGATA  
TATAAAACACAAAGGAAAAGGAGGTTGCTGGTCAGTCGTAGCATCTTACAGTATTGGGGA  
AAACAACCTGTTACAGTTTCATTGCTCTGAGTGACTGACGTGAGAGGAATTCGCTCTGCAGT  
GACGCTGTCTGTCACTCGCCTACCAGCTCGACGAGCAAGAGAGCGGGAGTCAGATGGTCC  
GCCTCATTCACCAGGAGCCGTA ACTCAAGCTGAACTGTGAAAGTGGTTAACACTGTATCC  
TAGGCCGTCTTTTTTTTTCTCCTCCTGTTTATTTTTTGTGTTTTATTTATAGTCTGATTTA  
AAACAATCAGATTCAAGTTGGTTAATTTTAGTTATGTAACAACCTGACGTGATGGAGGAA  
ACAACCTGTAAAGGGATTGTGTCTATGGTTTGATTCAGTCTAGAAATTTTATTTTCTTATAA  
CTTAAGTGCAATAAAAATGTGTTTTTT  
CATGTTA

*Mutated Fbxw7 (BS-2) (436 nts):*

GAGGGCTGTGGTGAATGGAAGAACATACATAGCAAACTGACAAGATATTTTAAAGATA

TATAAAACACAAAGGAAAAGGAGGTTGCTGGTCAGTCGTAGCATCTTACAGTATTGGGGA  
AAACAACCTGTTACAGTTTCATTGCTCTGAGTGACTGACGTGAGAGGAATTCGCTCTGCAGT  
GACGCTGTCTGTCACTCGCCTACCAGCTCGACGAGCAAGAGAGCGGGAGTCAGATGGTCC  
GCCTCATTACCAGGAGCCGTA ACTCAAGCTGAACTGTGAAAGTGGTTAACACTGTATCC  
TAGGCCGTCTTTTTTTTTCCTCCTCCTGTTTATTTTTTTGTTTGTTTTATTTATAGTCTGATTTA  
AAACAATCAGATTCAAGTTGGTTAATTTTAGTTATGTAACAACCTGACGTGATGGAGGAA  
ACAACCTGTAAAGGGATTGTGTCTATGGTTTGATTCACTTAGAAATTTATTTTCTTATAA  
CTTAAGAGGATTAAAATGTGTTTTTTCATGTTA

*MAP3K3 (436 nts):*

GGACATGCTGGCTCAGCATCCTCAGGACCAAGTTGTTGCTTAATTTATTGTTTTTTAATAA  
CTAATCCAGATAAAAAGTTGTGGGGCTTCAGGGTGACCTGGGCCCAAAGGTTCTGAAGGG  
CAGTTCCTGGCAGCCCCAGGCTTGCTGTGGGAAGGGGCCGTGCCGTCACCTTCTCATCATT  
CCATGGGGTGTGTCTGCCTGGGCCAACTCTGCATGGAGAGGCCAGGGCTGGGGACAGTCC  
GCACTCTGCCACCCTCCTGCCCCTTCCACCCACCCCAGCTCTATGTCTGTGTCTGAATTGTG  
GATCGTGCAGCCATGGTTATTGTGGAACCTGTGGAACCTGCAGCCATAGTTATTTGACTATA  
TCTTGACCGAGGGCTTGCAAGTGCAGTGCAGGAGCCAGGCCAGTGTGCGCATTACTTACAATAAAA  
GGGATCATTTA

*Mutated MAP3K3 (436 nts):*

GGACATGCTGGCTCAGCATCCTCAGGACCAAGTTGTTGCTTAATTTATTGTTTTTTAATAA  
CTAATCCAGATAAAAAGTTGTGGGGCTTCAGGGTGACCTGGGCCCAAAGGTTCTGAAGGG  
CAGTTCCTGGCAGCCCCAGGCTTGCTGTGGGAAGGGGCCGTGCCGTCACCTTCTCATCATT  
CCATGGGGTGTGTCTGCCTGGGCCAACTCTGCATGGAGAGGCCAGGGCTGGGGACAGTCC  
GCACTCTGCCACCCTCCTGCCCCTTCCACCCACCCCAGCTCTATGTCTGTGTCTGAATTGTG



GATCGTGCAGCCATGGTTATTGTGGAACCTGTGGAACCTGCAGCCATAGTTATTTGACTATA  
TCTTGACCGAGGGCTTGCAGTGCAAAGCCAGCCGACTGTTGCGCATTACTTACAATAAAA  
GGGATCATTTA

*Cloned 5'UTRs:*

CD69

ACTGAACAAGACAGCTCCAGCTACATCTCTCCGTGGACCACTTGAGAGTCGCCAGGGACC  
TTGAGGGGAAAAAATTA AAAAAGG

$\beta$ -Actin

CTGTTCGAGTCGCGTCCACCCGCGAGCACAGCTTCTTTGCAGCTCCTTCGTTGCCGGTCCAC  
ACCCGCCACCAGTTCGCC

$\Delta$ HP

ACTGAACAAGACAGCTCCAGCTACATCTCTCCGTGGAAGGGACCTTGAGGGGAAAAAAA  
TTAAAAAGG

Mut-uORF

ACTGAACAAGACAGCTCCAGCTACTTCTCTCCTTGGACCACTTGAGAGTC GCCAGGGACC  
TTGAGGGGAA AAAAATTA AAAA AAGG

**Electroporation and luciferase reporter assay**

Electroporation of the activated B cells were conducted following manufacturer's protocol (Lonza, Nucleofector Kit for Stimulated Mouse B cells, VVPA-1010). Briefly, purified B cells were activated with LPS and IL-4 in B cell media for 24 hours in 37°C incubator. Cells were harvested and wash once with PBS to remove residual media. In each electroporation reaction, 8-12 million B cells were re-suspended in the 200µl nucleofector solution at room temperature with 250ng plasmid for one million B cells. Program Z-001 in the Nucleofector 2b machine was selected. The electroporated cells were immediately transferred to LPS and IL-4 supplemented and 37°C-pre-warmed B cells media. This protocol achieved 70% transfection efficiency with 60% live cells at 4h post-electroporation. Upon harvest, cells were washed with PBS once, lysed in PLB solution, and subjected to dual reporter assay following manufacturer's instructions (Promega, E1960). Alternatively, harvested cells were lysed in TRIzol for RNA extraction. Total RNA was purified from TRIzol-lysed B cells using Direct-zol RNA miniprep (Zymo Research, R2052). qRT-PCR analysis of hRluc and Rluc expression was performed as described.

## Supplementary References

1. Jin HY, Gonzalez-Martin A, Miletic A, Lai M, Knight S, Sabouri-Ghomi M, et al. Transfection of microRNA mimics should be used with caution. *Frontiers in Genetics*. 2015;6:340. doi: 10.3389/fgene.2015.00340.
2. Xiao C, Calado DP, Galler G, Thai TH, Patterson HC, Wang J, et al. MiR-150 controls B cell differentiation by targeting the transcription factor c-Myb. *Cell*. 2007;131(1):146-59. Epub 2007/10/10. doi: S0092-8674(07)00958-0 [pii] 10.1016/j.cell.2007.07.021. PubMed PMID: 17923094.
3. Sanuki R, Onishi A, Koike C, Muramatsu R, Watanabe S, Muranishi Y, et al. miR-124a is required for hippocampal axogenesis and retinal cone survival through Lhx2 suppression. *Nat Neurosci*. 2011;14(9):1125-34. Epub 2011/08/23. doi: nn.2897 [pii] 10.1038/nn.2897. PubMed PMID: 21857657.
4. Bissels U, Wild S, Tomiuk S, Holste A, Hafner M, Tuschl T, et al. Absolute quantification of microRNAs by using a universal reference. *RNA*. 2009;15(12):2375-84. Epub 2009/10/29. doi: rna.1754109 [pii] 10.1261/rna.1754109. PubMed PMID: 19861428; PubMed Central PMCID: PMC2779673.
5. Ingolia NT, Ghaemmaghami S, Newman JRS, Weissman JS. Genome-Wide Analysis in Vivo of Translation with Nucleotide Resolution Using Ribosome Profiling. *Science*. 2009;324(5924):218-23. doi: Doi 10.1126/Science.1168978. PubMed PMID: ISI:000265024400037.
6. Ingolia NT, Brar GA, Rouskin S, McGeachy AM, Weissman JS. The ribosome profiling strategy for monitoring translation in vivo by deep sequencing of ribosome-protected mRNA fragments. *Nat Protoc*. 2012;7(8):1534-50. Epub 2012/07/28. doi: nprot.2012.086 [pii] 10.1038/nprot.2012.086. PubMed PMID: 22836135; PubMed Central PMCID: PMC3535016.
7. Langmead B, Trapnell C, Pop M, Salzberg SL. Ultrafast and memory-efficient alignment of short DNA sequences to the human genome. *Genome Biol*. 2009;10(3):R25. Epub 2009/03/06. doi: gb-2009-10-3-r25 [pii] 10.1186/gb-2009-10-3-r25. PubMed PMID: 19261174; PubMed Central PMCID: PMC2690996.
8. Kim D, Pertea G, Trapnell C, Pimentel H, Kelley R, Salzberg SL. TopHat2: accurate alignment of transcriptomes in the presence of insertions, deletions and gene fusions. *Genome Biol*. 2013;14(4):R36. Epub 2013/04/27. doi: gb-2013-14-4-r36 [pii] 10.1186/gb-2013-14-4-r36. PubMed PMID: 23618408; PubMed Central PMCID: PMC4053844.
9. Trapnell C, Roberts A, Goff L, Pertea G, Kim D, Kelley DR, et al. Differential gene and transcript expression analysis of RNA-seq experiments with TopHat and Cufflinks. *Nat Protoc*. 2012;7(3):562-78. Epub 2012/03/03. doi: nprot.2012.016 [pii] 10.1038/nprot.2012.016. PubMed PMID: 22383036; PubMed Central PMCID: PMC3334321.
10. Trapnell C, Hendrickson DG, Sauvageau M, Goff L, Rinn JL, Pachter L. Differential analysis of gene regulation at transcript resolution with RNA-seq. *Nat Biotechnol*. 2013;31(1):46-53. Epub 2012/12/12. doi: nbt.2450 [pii] 10.1038/nbt.2450. PubMed PMID: 23222703; PubMed Central PMCID: PMC3869392.

11. Quinlan AR, Hall IM. BEDTools: a flexible suite of utilities for comparing genomic features. *Bioinformatics*. 2010;26(6):841-2. doi: Doi 10.1093/Bioinformatics/Btq033. PubMed PMID: ISI:000275243500019.
12. Wolfe AL, Singh K, Zhong Y, Drewe P, Rajasekhar VK, Sanghvi VR, et al. RNA G-quadruplexes cause eIF4A-dependent oncogene translation in cancer. *Nature*. 2014;513(7516):65-70. Epub 2014/08/01. doi: nature13485 [pii] 10.1038/nature13485. PubMed PMID: 25079319; PubMed Central PMCID: PMC4492470.
13. Gruber AR, Lorenz R, Bernhart SH, Neubock R, Hofacker IL. The Vienna RNA Websuite. *Nucleic Acids Research*. 2008;36:W70-W4. doi: Doi 10.1093/Nar/Gkn188. PubMed PMID: ISI:000258142300015.
14. Xiao C, Srinivasan L, Calado DP, Patterson HC, Zhang B, Wang J, et al. Lymphoproliferative disease and autoimmunity in mice with increased miR-17-92 expression in lymphocytes. *Nat Immunol*. 2008;9(4):405-14. Epub 2008/03/11. doi: ni1575 [pii] 10.1038/ni1575. PubMed PMID: 18327259; PubMed Central PMCID: PMC2533767.
